# Supplementary material
Source: PubMed Central journal article supplement (PMC8073627)
Supplement: NIHMS1692423-supplement-Supplement.pdf [file NIHMS1692423-supplement-Supplement.pdf]

## Supplemental Information for:

### The gut microbiota and Bergmann's rule in wild house mice

Taichi A. Suzuki<sup>1</sup>, Felipe M. Martins<sup>2</sup>, Megan Phifer-Rixey<sup>3</sup>, and Michael W. Nachman<sup>1</sup>

<sup>1</sup> *Department of Integrative Biology and Museum of Vertebrate Zoology, University of California Berkeley, Berkeley, CA, 94720, USA.*

<sup>2</sup> *Research School of Biology, The Australian National University, Canberra, Australia.*

<sup>3</sup> *Department of Biology, Monmouth University, West Long Branch, NJ, 07764, USA.*

#### Table of Contents:

|                  |          |
|------------------|----------|
| <b>Table S1</b>  | Page 2-4 |
| <b>Table S2</b>  | Page 5   |
| <b>Table S3</b>  | Page 6-7 |
| <b>Table S4</b>  | Page 8   |
| <b>Table S5</b>  | Page 9   |
| <b>Table S6</b>  | Page 10  |
| <b>Table S7</b>  | Page 11  |
| <b>Table S8</b>  | Page 12  |
| <b>Table S9</b>  | Page 13  |
| <b>Table S10</b> | Page 14  |
| <b>Table S11</b> | Page 15  |
| <b>Table S12</b> | Page 16  |
| <b>Table S13</b> | Page 17  |
| <b>Table S14</b> | Page 18  |
| <b>Figure S1</b> | Page 19  |
| <b>Figure S2</b> | Page 20  |
| <b>Figure S3</b> | Page 21  |
| <b>Figure S4</b> | Page 22  |

# MOLECULAR ECOLOGY

**Table S1.** Sample information of wild-caught individuals (n = 166). (continued)

| SampleID | Transect_ID | Country | Population | Latitude  | Longitude    | Altitude (m) | Sex | Weight (g) | Body length (mm) | BMI     | Carbon ( $\delta^{13}\text{C}$ ) | Nitrogen ( $\delta^{15}\text{N}$ ) | Climate_PC1  | Climate_PC2 | MVZ ID          | Included in analyses?* |
|----------|-------------|---------|------------|-----------|--------------|--------------|-----|------------|------------------|---------|----------------------------------|------------------------------------|--------------|-------------|-----------------|------------------------|
| MPR.108  | East-NA     | USA     | FL         | 29.67445  | -82.33093333 | 12.19        | F   | 13.00      | 77.0             | 0.00219 | -21.8                            | 5.2                                | 3.019120634  | 1.496293134 | MVZ:Mamm:230591 | yes                    |
| MPR.110  | East-NA     | USA     | FL         | 29.6233   | -82.340333   | 0.61         | F   | 23.50      | 90.0             | 0.00290 | -21.8                            | 7.0                                | 3.145907044  | 1.510618919 | MVZ:Mamm:230601 | yes                    |
| MPR.112  | East-NA     | USA     | FL         | 29.778929 | -82.416971   | 11.28        | M   | 12.75      | 77.0             | 0.00215 | -18.8                            | 5.9                                | 3.047376426  | 1.500056192 | MVZ:Mamm:230593 | yes                    |
| MPR.113  | East-NA     | USA     | FL         | 29.78685  | -82.495877   | 4.57         | F   | 11.38      | 84.0             | 0.00161 | -20.0                            | 6.2                                | 3.047376426  | 1.500056192 | MVZ:Mamm:230590 | yes                    |
| MPR.114  | East-NA     | USA     | FL         | 29.37283  | -82.19892    | 8.84         | F   | 15.50      | 84.0             | 0.00220 | -22.2                            | 8.0                                | 3.150769063  | 1.459955475 | MVZ:Mamm:230603 | yes                    |
| MPR.115  | East-NA     | USA     | FL         | 29.45224  | -82.3403     | 11.28        | F   | 14.00      | 84.0             | 0.00198 | -22.6                            | 4.5                                | 3.255973173  | 1.465003211 | MVZ:Mamm:230595 | yes                    |
| MPR.116  | East-NA     | USA     | FL         | 29.39018  | -82.1299     | 7.32         | M   | 14.25      | 82.0             | 0.00212 | -17.9                            | 7.1                                | 3.078611644  | 1.346975464 | MVZ:Mamm:230597 | yes                    |
| MPR.118  | East-NA     | USA     | FL         | 29.10066  | -82.14192    | 4.88         | M   | 9.50       | 68.0             | 0.00205 | -21.8                            | 7.1                                | 3.184344055  | 1.142433585 | MVZ:Mamm:230599 | yes                    |
| MPR.120  | East-NA     | USA     | FL         | 29.7828   | -82.3755     | 28.04        | M   | 14.00      | 82.5             | 0.00206 | -24.2                            | 7.7                                | 3.047376426  | 1.500056192 | MVZ:Mamm:230594 | yes                    |
| MPR.121  | East-NA     | USA     | FL         | 29.65652  | -82.5872     | 18.90        | F   | 23.00      | 92.0             | 0.00272 | -16.8                            | 7.6                                | 3.10109681   | 1.310381449 | MVZ:Mamm:230596 | yes                    |
| MPR.123  | East-NA     | USA     | GA         | 34.0989   | -83.3454     | 76.50        | M   | 11.00      | 75.5             | 0.00193 | -17.9                            | 7.1                                | 0.748388305  | 2.880295974 | MVZ:Mamm:230612 | yes                    |
| MPR.124  | East-NA     | USA     | GA         | 34.10006  | -83.59695    | 88.70        | F   | 14.50      | 78.0             | 0.00238 | -19.9                            | 6.5                                | 0.775114897  | 2.962729027 | MVZ:Mamm:230604 | yes                    |
| MPR.125  | East-NA     | USA     | GA         | 34.09889  | -83.34537    | 76.20        | M   | 11.00      | 69.0             | 0.00231 | -21.4                            | 9.9                                | 0.748388305  | 2.880295974 | MVZ:Mamm:230609 | yes                    |
| MPR.126  | East-NA     | USA     | GA         | 34.11877  | -83.57092    | 68.28        | M   | 18.50      | 80.0             | 0.00289 | -14.8                            | 7.3                                | 0.775114897  | 2.962729027 | MVZ:Mamm:230608 | yes                    |
| MPR.128  | East-NA     | USA     | GA         | 33.87025  | -83.28893    | 68.28        | M   | 15.75      | 81.0             | 0.00240 | -21.3                            | 7.8                                | 0.610314034  | 2.624280429 | MVZ:Mamm:230606 | yes                    |
| MPR.129  | East-NA     | USA     | GA         | 33.83757  | -83.35049    | 69.49        | M   | 12.75      | 77.0             | 0.00215 | -20.4                            | 6.6                                | 0.63966048   | 2.705703223 | MVZ:Mamm:230615 | yes                    |
| MPR.130  | East-NA     | USA     | GA         | 33.94638  | -83.38383    | 85.34        | F   | 16.13      | 80.0             | 0.00252 | -17.3                            | 6.4                                | 0.63966048   | 2.705703223 | MVZ:Mamm:230610 | yes                    |
| MPR.131  | East-NA     | USA     | GA         | 33.88584  | -83.48023    | 63.70        | F   | 9.00       | 65.0             | 0.00213 | -9.5                             | 9.6                                | 0.63966048   | 2.705703223 | MVZ:Mamm:230613 | yes                    |
| MPR.132  | East-NA     | USA     | GA         | 33.8437   | -83.33744    | 70.10        | F   | 11.00      | 75.5             | 0.00193 | -18.1                            | 7.8                                | 0.63966048   | 2.705703223 | MVZ:Mamm:230614 | yes                    |
| MPR.133  | East-NA     | USA     | GA         | 33.94639  | -83.38384    | 66.45        | F   | 21.38      | 89.0             | 0.00270 | -15.1                            | 7.8                                | 0.63966048   | 2.705703223 | MVZ:Mamm:230607 | yes                    |
| MPR.134  | East-NA     | USA     | NH_VT      | 44.11202  | -72.04543    | 33.53        | F   | 19.13      | 83.0             | 0.00278 | -18.0                            | 8.3                                | -2.899652251 | 2.101904606 | MVZ:Mamm:230616 | yes                    |
| MPR.135  | East-NA     | USA     | NH_VT      | 44.11212  | -72.04551    | 19.20        | F   | 21.38      | 93.0             | 0.00247 | -15.5                            | 7.5                                | -2.899652251 | 2.101904606 | MVZ:Mamm:230617 | yes                    |
| MPR.137  | East-NA     | USA     | NH_VT      | 43.99797  | -72.10448    | 53.95        | F   | 13.38      | 81.0             | 0.00204 | -17.6                            | 10.8                               | NA           | NA          | MVZ:Mamm:230619 | no                     |
| MPR.138  | East-NA     | USA     | NH_VT      | 43.97192  | -72.08463    | 53.34        | M   | 14.75      | 86.0             | 0.00199 | -23.4                            | 5.7                                | -2.829600487 | 2.469157357 | MVZ:Mamm:230622 | yes                    |
| MPR.140  | East-NA     | USA     | NH_VT      | 43.97281  | -72.09393    | 42.98        | M   | 14.00      | 74.0             | 0.00256 | -17.8                            | 6.3                                | -2.829600487 | 2.469157357 | MVZ:Mamm:230621 | yes                    |
| MPR.141  | East-NA     | USA     | NH_VT      | 43.95075  | -72.11753    | 48.46        | M   | 19.50      | 86.0             | 0.00264 | -19.5                            | 11.8                               | -2.829600487 | 2.469157357 | MVZ:Mamm:230648 | yes                    |
| MPR.142  | East-NA     | USA     | NH_VT      | 43.9609   | -72.11585    | 47.55        | F   | 23.75      | 94.0             | 0.00269 | -19.9                            | 7.6                                | -2.829600487 | 2.469157357 | MVZ:Mamm:230649 | yes                    |
| MPR.143  | East-NA     | USA     | NH_VT      | 43.927907 | -72.12301    | 55.47        | M   | 15.50      | 81.5             | 0.00233 | -14.4                            | 11.3                               | -2.829600487 | 2.469157357 | MVZ:Mamm:230647 | yes                    |
| MPR.144  | East-NA     | USA     | NH_VT      | 44.12806  | -72.04328    | 36.58        | M   | 18.25      | 87.5             | 0.00238 | -15.5                            | 7.5                                | -2.899652251 | 2.101904606 | MVZ:Mamm:230651 | yes                    |
| MPR.145  | East-NA     | USA     | NH_VT      | 43.95596  | -72.11164    | 47.55        | F   | 21.00      | 98.0             | 0.00219 | -19.3                            | 6.7                                | -2.829600487 | 2.469157357 | MVZ:Mamm:230650 | yes                    |
| MPR.146  | East-NA     | USA     | PA         | 40.618763 | -75.36362    | 19.51        | F   | 13.13      | 86.0             | 0.00177 | -19.9                            | 8.0                                | -1.165371739 | 3.014369534 | MVZ:Mamm:230633 | yes                    |
| MPR.147  | East-NA     | USA     | PA         | 40.50319  | -75.3174     | 35.05        | M   | 16.00      | 87.0             | 0.00211 | -20.5                            | 6.7                                | -1.172455455 | 3.113917084 | MVZ:Mamm:230627 | yes                    |
| MPR.148  | East-NA     | USA     | PA         | 40.45099  | -75.40128    | 51.51        | M   | 13.25      | 75.0             | 0.00236 | -21.6                            | 6.1                                | -1.16397802  | 3.029384435 | MVZ:Mamm:230628 | yes                    |
| MPR.150  | East-NA     | USA     | PA         | 40.59571  | -75.65891    | 55.47        | F   | 11.88      | 75.0             | 0.00211 | -23.8                            | 5.9                                | -1.204821786 | 2.979585317 | MVZ:Mamm:230631 | yes                    |
| MPR.151  | East-NA     | USA     | PA         | 40.55189  | -75.32455    | 46.63        | M   | 15.00      | 78.5             | 0.00243 | -23.2                            | 7.1                                | -1.172455455 | 3.113917084 | MVZ:Mamm:230634 | yes                    |
| MPR.152  | East-NA     | USA     | PA         | 40.53107  | -75.34738    | 98.15        | M   | 15.00      | 81.0             | 0.00229 | -15.4                            | 6.7                                | -1.165371739 | 3.014369534 | MVZ:Mamm:230629 | yes                    |
| MPR.153  | East-NA     | USA     | PA         | 40.500421 | -76.103425   | 56.08        | F   | 21.25      | 81.5             | 0.00320 | -10.7                            | 8.4                                | -1.313819446 | 3.095557022 | MVZ:Mamm:230624 | yes                    |
| MPR.154  | East-NA     | USA     | PA         | 40.461968 | -76.08789    | 44.81        | F   | 17.25      | 82.0             | 0.00257 | -19.9                            | 6.3                                | -1.230106952 | 2.91071536  | MVZ:Mamm:230623 | yes                    |
| MPR.155  | East-NA     | USA     | PA         | 40.70747  | -75.66738    | 51.82        | M   | 14.50      | 78.0             | 0.00238 | -19.9                            | 7.6                                | -1.325880152 | 3.187868743 | MVZ:Mamm:230632 | yes                    |
| MPR.156  | East-NA     | USA     | PA         | 40.526708 | -76.097258   | 56.39        | F   | 21.00      | 96.0             | 0.00228 | -17.0                            | 6.8                                | -1.313819446 | 3.095557022 | MVZ:Mamm:230625 | yes                    |
| MPR.159  | East-NA     | USA     | VA         | 37.74117  | -77.57546    | 22.86        | F   | 14.75      | 77.0             | 0.00249 | -23.5                            | 7.4                                | -0.495585742 | 2.688645661 | MVZ:Mamm:230641 | yes                    |
| MPR.161  | East-NA     | USA     | VA         | 37.65535  | -77.72927    | 28.04        | F   | 15.25      | 80.0             | 0.00238 | -24.1                            | 8.0                                | -0.475081391 | 2.662020351 | MVZ:Mamm:230638 | yes                    |
| MPR.162  | East-NA     | USA     | VA         | 37.48763  | -77.40208    | 14.33        | M   | 17.25      | 86.0             | 0.00233 | -19.5                            | 6.5                                | -0.094880991 | 2.598648986 | MVZ:Mamm:230645 | yes                    |
| MPR.163  | East-NA     | USA     | VA         | 37.65501  | -77.73977    | 27.13        | M   | 15.13      | 78.0             | 0.00249 | -22.8                            | 5.9                                | -0.475081391 | 2.662020351 | MVZ:Mamm:230637 | yes                    |
| MPR.164  | East-NA     | USA     | VA         | 37.67885  | -77.5166     | 15.54        | M   | 18.25      | 91.0             | 0.00220 | -20.3                            | 6.9                                | -0.495585742 | 2.688645661 | MVZ:Mamm:230642 | yes                    |
| MPR.165  | East-NA     | USA     | VA         | 37.55811  | -77.48073    | 22.25        | M   | 10.75      | 66.0             | 0.00247 | -19.3                            | 8.2                                | -0.315642272 | 2.700222686 | MVZ:Mamm:230644 | yes                    |
| MPR.166  | East-NA     | USA     | VA         | 37.76063  | -77.48351    | 23.16        | M   | 15.00      | 80.0             | 0.00234 | -19.0                            | 5.9                                | -0.417232494 | 2.672104793 | MVZ:Mamm:230639 | yes                    |
| MPR.167  | East-NA     | USA     | VA         | 37.52756  | -77.6492     | 33.22        | F   | 13.00      | 80.0             | 0.00203 | -14.7                            | 9.6                                | -0.436979296 | 2.726414248 | MVZ:Mamm:230635 | yes                    |
| MPR.168  | East-NA     | USA     | VA         | 37.85448  | -77.26262    | 18.90        | F   | 13.50      | 82.0             | 0.00201 | NA                               | NA                                 | -0.425198809 | 2.72319745  | MVZ:Mamm:230646 | yes                    |
| MPR.169  | East-NA     | USA     | VA         | 37.55537  | -77.66149    | 11.89        | F   | 11.00      | 69.0             | 0.00231 | -14.1                            | 7.5                                | -0.436979296 | 2.726414248 | MVZ:Mamm:230636 | yes                    |

\* Samples were excluded from all analyses when the samples had < 5500 reads per sample.

# MOLECULAR ECOLOGY

**Table S1.** Sample information of wild-caught individuals (n = 166). (continued)

| SampleID | Transect_ID | Country | Population | Latitude | Longitude  | Altitude (m) | Sex | Weight (g) | Body length (mm) | BMI     | Carbon ( $\delta^{13}\text{C}$ ) | Nitrogen ( $\delta^{15}\text{N}$ ) | Climate_PC1  | Climate_PC2  | MVZ ID          | Included in analyses?* |
|----------|-------------|---------|------------|----------|------------|--------------|-----|------------|------------------|---------|----------------------------------|------------------------------------|--------------|--------------|-----------------|------------------------|
| MPR.170  | West-NA     | USA     | AZ         | 32.28746 | -110.99596 | 657.00       | F   | 15.50      | 89.0             | 0.00196 | -15.1                            | 6.8                                | 0.358472791  | -3.31676568  | MVZ.Mamm.230794 | yes                    |
| MPR.171  | West-NA     | USA     | AZ         | 32.29215 | -111.02631 | 642.00       | F   | 17.30      | 87.0             | 0.00229 | -20.8                            | 7.6                                | 0.276087927  | -3.222969801 | MVZ.Mamm.230795 | yes                    |
| MPR.172  | West-NA     | USA     | AZ         | 32.2904  | -111.02207 | 649.00       | M   | 21.30      | 93.0             | 0.00246 | -16.4                            | 7.3                                | 0.276087927  | -3.222969801 | MVZ.Mamm.230796 | yes                    |
| MPR.173  | West-NA     | USA     | AZ         | 32.16881 | -110.56997 | 704.00       | M   | 15.10      | 79.0             | 0.00242 | -22.1                            | 6.7                                | -0.025452469 | -2.400460413 | MVZ.Mamm.230797 | yes                    |
| DL.007   | West-NA     | USA     | AZ         | 32.1013  | -110.4658  | 845.00       | M   | 17.30      | 82.0             | 0.00257 | -22.8                            | 8.4                                | -0.073075508 | -3.133103585 | MVZ.Mamm.230441 | yes                    |
| DL.008   | West-NA     | USA     | AZ         | 32.6948  | -110.4617  | 835.00       | F   | 22.50      | 84.0             | 0.00319 | -20.4                            | 8.1                                | -0.325488968 | -2.324299084 | MVZ.Mamm.230442 | yes                    |
| TAS.187  | West-NA     | USA     | AZ         | 32.16881 | -110.56997 | 699.52       | M   | 18.70      | 88.0             | 0.00241 | -15.4                            | 5.3                                | -0.025452469 | -2.400460413 | MVZ.Mamm.230541 | yes                    |
| TAS.189  | West-NA     | USA     | AZ         | 32.10018 | -111.05153 | 719.02       | F   | 21.20      | 99.5             | 0.00214 | -20.3                            | 6.1                                | 0.312026587  | -3.360398786 | MVZ.Mamm.230534 | yes                    |
| TAS.191  | West-NA     | USA     | AZ         | 32.07955 | -111.03692 | 802.23       | F   | 20.60      | 94.5             | 0.00231 | -18.2                            | 7.5                                | 0.312026587  | -3.360398786 | MVZ.Mamm.230531 | yes                    |
| TAS.192  | West-NA     | USA     | AZ         | 32.08793 | -111.00665 | 690.98       | M   | 20.90      | 88.0             | 0.00270 | NA                               | NA                                 | 0.312026587  | -3.360398786 | MVZ.Mamm.230523 | yes                    |
| TAS.010  | West-NA     | USA     | IT_SiGeorg | 37.02541 | -113.37005 | 760.17       | M   | 16.10      | 91.5             | 0.00192 | -19.5                            | 8.1                                | -1.878258652 | -2.800155871 | MVZ.Mamm.230573 | yes                    |
| TAS.011  | West-NA     | USA     | IT_SiGeorg | 37.05353 | -113.31886 | 698.60       | F   | 19.40      | 93.5             | 0.00222 | -17.8                            | 6.6                                | -2.088695676 | -2.313327014 | MVZ.Mamm.230568 | yes                    |
| TAS.012  | West-NA     | USA     | IT_SiGeorg | 37.06415 | -113.30215 | 795.22       | M   | 16.80      | 91.0             | 0.00203 | -21.6                            | 7.3                                | -2.088695676 | -2.313327014 | MVZ.Mamm.230570 | yes                    |
| TAS.013  | West-NA     | USA     | IT_SiGeorg | 37.04595 | -113.31065 | 834.54       | F   | 25.10      | 92.5             | 0.00293 | -16.5                            | 7.5                                | -2.088695676 | -2.313327014 | MVZ.Mamm.230571 | yes                    |
| TAS.014  | West-NA     | USA     | IT_SiGeorg | 37.05116 | -113.29955 | 807.42       | M   | 13.00      | 85.0             | 0.00180 | -17.4                            | 5.6                                | -2.088695676 | -2.313327014 | MVZ.Mamm.230572 | yes                    |
| TAS.015  | West-NA     | USA     | IT_SiGeorg | 37.03825 | -113.3134  | 806.20       | F   | 17.30      | 89.0             | 0.00218 | -19.8                            | 7.3                                | -2.088695676 | -2.313327014 | MVZ.Mamm.230578 | yes                    |
| TAS.016  | West-NA     | USA     | IT_SiGeorg | 37.0722  | -113.33443 | 893.37       | M   | 8.50       | 71.0             | 0.00169 | -22.3                            | 5.6                                | -1.878258652 | -2.800155871 | MVZ.Mamm.230574 | yes                    |
| TAS.017  | West-NA     | USA     | IT_SiGeorg | 37.0735  | -113.36928 | 830.88       | M   | 18.10      | 91.0             | 0.00219 | -22.5                            | 10.4                               | -1.878258652 | -2.800155871 | MVZ.Mamm.230569 | yes                    |
| TAS.021  | West-NA     | USA     | IT_SiGeorg | 37.07673 | -113.36399 | 860.45       | F   | 16.80      | 85.5             | 0.00230 | -21.4                            | 4.6                                | -1.878258652 | -2.800155871 | MVZ.Mamm.230575 | yes                    |
| TAS.022  | West-NA     | USA     | IT_SiGeorg | 37.12416 | -113.3702  | 1175.61      | F   | 14.40      | 82.5             | 0.00212 | -16.7                            | 6.9                                | -1.878258652 | -2.800155871 | MVZ.Mamm.230582 | yes                    |
| TAS.027  | West-NA     | USA     | UT_Provo   | 40.09489 | -111.42196 | 1369.16      | F   | 7.60       | 65.0             | 0.00180 | -11.9                            | 9.9                                | -3.590352583 | -0.882850933 | MVZ.Mamm.230566 | yes                    |
| TAS.028  | West-NA     | USA     | UT_Provo   | 40.05553 | -111.39567 | 1418.84      | M   | 9.10       | 71.5             | 0.00178 | -23.2                            | 6.6                                | -3.590352583 | -0.882850933 | MVZ.Mamm.230561 | yes                    |
| TAS.029  | West-NA     | USA     | UT_Provo   | 40.05862 | -111.40421 | 1392.33      | M   | 18.40      | 92.0             | 0.00217 | -17.9                            | 6.4                                | -3.590352583 | -0.882850933 | MVZ.Mamm.230564 | yes                    |
| TAS.030  | West-NA     | USA     | UT_Provo   | 40.07961 | -111.43823 | 1372.82      | M   | 17.20      | 89.5             | 0.00215 | -22.5                            | 11.9                               | -3.590352583 | -0.882850933 | MVZ.Mamm.230562 | yes                    |
| TAS.031  | West-NA     | USA     | UT_Provo   | 40.03512 | -111.43952 | 1389.28      | F   | 15.20      | 84.5             | 0.00213 | -23.6                            | 8.5                                | -3.590352583 | -0.882850933 | MVZ.Mamm.230558 | yes                    |
| TAS.032  | West-NA     | USA     | UT_Provo   | 40.06017 | -111.39273 | 1388.36      | F   | 12.50      | 80.0             | 0.00195 | -15.7                            | 6.7                                | -3.590352583 | -0.882850933 | MVZ.Mamm.230563 | yes                    |
| TAS.038  | West-NA     | USA     | UT_Provo   | 40.15336 | -111.42615 | 1374.95      | M   | 17.20      | 90.0             | 0.00212 | -17.9                            | 9.4                                | -3.590352583 | -0.882850933 | MVZ.Mamm.230559 | yes                    |
| TAS.039  | West-NA     | USA     | UT_Provo   | 40.2214  | -111.46032 | 1388.97      | M   | 20.50      | 91.0             | 0.00248 | -13.7                            | 20.9                               | -3.471903896 | -0.56844779  | MVZ.Mamm.230560 | yes                    |
| TAS.040  | West-NA     | USA     | UT_Provo   | 40.22479 | -111.52646 | 1383.18      | F   | 16.60      | 86.0             | 0.00224 | NA                               | NA                                 | -3.081811429 | -0.508741803 | MVZ.Mamm.230556 | yes                    |
| TAS.047  | West-NA     | USA     | UT_Provo   | 40.08865 | -111.40444 | 1374.65      | F   | 19.10      | 91.5             | 0.00228 | -19.4                            | 6.0                                | -3.590352583 | -0.882850933 | MVZ.Mamm.230567 | yes                    |
| TAS.048  | West-NA     | USA     | MT         | 46.19651 | -114.06723 | 1062.23      | F   | 20.20      | 90.0             | 0.00249 | -17.2                            | 8.3                                | -3.377349089 | -1.226784111 | MVZ.Mamm.230551 | yes                    |
| TAS.049  | West-NA     | USA     | MT         | 46.20361 | -114.0688  | 1057.05      | M   | 9.60       | 74.0             | 0.00175 | -22.4                            | 7.7                                | -3.377349089 | -1.226784111 | MVZ.Mamm.230552 | yes                    |
| TAS.050  | West-NA     | USA     | MT         | 46.21172 | -114.07164 | 1054.00      | F   | 15.00      | 83.5             | 0.00215 | -19.7                            | 6.8                                | -3.377349089 | -1.226784111 | MVZ.Mamm.230550 | yes                    |
| TAS.051  | West-NA     | USA     | MT         | 46.24613 | -114.0517  | 1032.36      | F   | 16.70      | 91.5             | 0.00199 | -24.9                            | 9.5                                | -3.377349089 | -1.226784111 | MVZ.Mamm.230553 | yes                    |
| TAS.052  | West-NA     | USA     | MT         | 46.30637 | -114.043   | 1042.42      | M   | 14.60      | 80.0             | 0.00228 | -23.9                            | 7.8                                | -3.377349089 | -1.226784111 | MVZ.Mamm.230554 | yes                    |
| TAS.055  | West-NA     | USA     | MT         | 46.51463 | -113.59165 | 985.72       | M   | 18.50      | 87.5             | 0.00242 | -17.2                            | 6.8                                | -3.960153809 | -0.510943112 | MVZ.Mamm.230548 | yes                    |
| TAS.061  | West-NA     | USA     | MT         | 46.94733 | -114.08744 | 1019.00      | F   | 17.20      | 92.5             | 0.00201 | -20.7                            | 5.7                                | -3.364103279 | -0.931874762 | MVZ.Mamm.230549 | yes                    |
| TAS.062  | West-NA     | USA     | MT         | 47.74106 | -114.22883 | 1000.05      | F   | 25.80      | 92.5             | 0.00302 | -22.2                            | 8.8                                | -2.913161999 | -0.272844934 | MVZ.Mamm.230544 | yes                    |
| TAS.063  | West-NA     | USA     | MT         | 47.31796 | -114.07094 | 885.75       | F   | 15.50      | 86.0             | 0.00210 | -22.9                            | 9.1                                | -3.226204464 | -0.40455511  | MVZ.Mamm.230545 | yes                    |
| TAS.066  | West-NA     | USA     | MT         | 46.58284 | -114.07613 | 987.25       | M   | 14.00      | 85.5             | 0.00192 | -16.4                            | 8.9                                | -3.42046972  | -1.191265716 | MVZ.Mamm.230546 | yes                    |
| TAS.082  | West-NA     | Canada  | EDM        | 53.24522 | -113.19141 | 754.99       | F   | 12.60      | 75.0             | 0.00224 | -23.7                            | 5.1                                | -4.096590882 | -0.609927899 | MVZ.Mamm.230515 | yes                    |
| TAS.088  | West-NA     | Canada  | EDM        | 53.47494 | -113.19216 | 669.65       | F   | 23.50      | 101.0            | 0.00230 | -22.0                            | 6.2                                | -4.079839844 | -0.59760881  | MVZ.Mamm.230511 | yes                    |
| TAS.097  | West-NA     | Canada  | EDM        | 53.51691 | -113.18164 | 731.00       | M   | 16.50      | 88.0             | 0.00213 | -18.3                            | 7.3                                | -4.04377705  | -0.619775593 | MVZ.Mamm.230509 | yes                    |
| TAS.099  | West-NA     | Canada  | EDM        | 53.51691 | -113.18164 | 731.00       | M   | NA         | NA               | NA      | -20.5                            | 6.9                                | -4.04377705  | -0.619775593 | MVZ.Mamm.230510 | yes                    |
| TAS.100  | West-NA     | Canada  | EDM        | 53.26386 | -113.04173 | 746.76       | F   | NA         | NA               | NA      | -24.9                            | 5.3                                | -4.16452595  | -0.57321016  | MVZ.Mamm.230503 | yes                    |
| TAS.103  | West-NA     | Canada  | EDM        | 53.23738 | -113.11374 | 768.40       | M   | 17.00      | 83.0             | 0.00247 | -23.1                            | 5.4                                | -4.16452595  | -0.57321016  | MVZ.Mamm.230496 | yes                    |
| TAS.105  | West-NA     | Canada  | EDM        | 53.30768 | -113.52365 | 730.61       | F   | 15.50      | 83.0             | 0.00225 | -24.4                            | 5.5                                | -4.024961628 | -0.689256543 | MVZ.Mamm.230466 | yes                    |
| TAS.106  | West-NA     | Canada  | EDM        | 53.32527 | -113.49395 | 676.66       | M   | 16.50      | 98.0             | 0.00172 | -21.2                            | 9.1                                | -4.047290511 | -0.640231984 | MVZ.Mamm.230495 | yes                    |
| TAS.108  | West-NA     | Canada  | EDM        | 53.30768 | -113.52365 | 730.61       | F   | NA         | NA               | NA      | -24.0                            | 5.1                                | -4.024961628 | -0.689256543 | MVZ.Mamm.230467 | yes                    |
| TAS.113  | West-NA     | Canada  | EDM        | 53.30768 | -113.52365 | 730.61       | M   | 11.50      | 71.0             | 0.00228 | -24.1                            | 8.6                                | -4.024961628 | -0.689256543 | MVZ.Mamm.230469 | yes                    |

\* Samples were excluded from all analyses when the samples had < 5500 reads per sample.

# MOLECULAR ECOLOGY

**Table S1.** Sample information of wild-caught individuals (n = 166). (continued)

| SampleID | Transect_ID | Country   | Population | Latitude  | Longitude    | Altitude (m) | Sex | Weight (g) | Body length (mm) | BMI     | Carbon ( $\delta^{13}\text{C}$ ) | Nitrogen ( $\delta^{15}\text{N}$ ) | Climate_PC1  | Climate_PC2  | MVZ ID          | Included in analyses?* |
|----------|-------------|-----------|------------|-----------|--------------|--------------|-----|------------|------------------|---------|----------------------------------|------------------------------------|--------------|--------------|-----------------|------------------------|
| FMM.111  | SA          | Argentina | Tandil     | -37.35775 | -59.12195    | 223.11       | F   | 15.25      | 92.0             | 0.00180 | -9.7                             | 11.3                               | NA           | NA           | MVZ.Mamm:231397 | no                     |
| FMM.112  | SA          | Argentina | Tandil     | -37.32752 | -59.0834     | 210.01       | F   | 11.50      | 84.0             | 0.00163 | -19.6                            | 7.3                                | NA           | NA           | MVZ.Mamm:231398 | no                     |
| FMM.113  | SA          | Argentina | Tandil     | -37.35    | -59.288075   | 210.01       | F   | 9.00       | 79.0             | 0.00144 | -22.5                            | 7.7                                | -0.009806602 | -0.156522121 | MVZ.Mamm:231399 | yes                    |
| FMM.116  | SA          | Argentina | Tandil     | -37.35574 | -59.20489444 | 257.86       | M   | 12.50      | 84.0             | 0.00177 | -22.3                            | 8.4                                | -0.009806602 | -0.156522121 | MVZ.Mamm:231405 | yes                    |
| FMM.119  | SA          | Argentina | Tandil     | -37.31618 | -59.10231667 | 210.01       | M   | 15.25      | 91.0             | 0.00184 | -21.2                            | 7.7                                | 0.129743331  | -0.021937099 | MVZ.Mamm:231403 | yes                    |
| FMM.121  | SA          | Argentina | Tandil     | -37.3188  | -59.10548333 | 203.91       | M   | 10.50      | 84.0             | 0.00149 | -22.9                            | 8.3                                | 0.129743331  | -0.021937099 | MVZ.Mamm:231407 | yes                    |
| FMM.122  | SA          | Argentina | Tandil     | -37.29083 | -59.20061667 | 200.86       | F   | 14.25      | 95.0             | 0.00158 | -22.6                            | 7.2                                | 0.155706896  | -0.126687425 | MVZ.Mamm:231408 | yes                    |
| FMM.124  | SA          | Argentina | Tandil     | -37.28982 | -59.1544     | 203.00       | F   | 14.00      | 83.0             | 0.00203 | -22.7                            | 6.7                                | 0.129743331  | -0.021937099 | MVZ.Mamm:231410 | yes                    |
| FMM.125  | SA          | Argentina | Ushuaia    | -54.78588 | -68.2755667  | 95.40        | F   | 21.75      | 90.0             | 0.00269 | -18.5                            | 8.4                                | -1.988510247 | 0.083350926  | MVZ.Mamm:231425 | yes                    |
| FMM.126  | SA          | Argentina | Ushuaia    | -54.78588 | -68.2755667  | 95.40        | F   | 12.25      | 88.0             | 0.00158 | -17.6                            | 8.1                                | -1.988510247 | 0.083350926  | MVZ.Mamm:231426 | yes                    |
| FMM.127  | SA          | Argentina | Ushuaia    | -54.78588 | -68.2755667  | 95.40        | M   | 10.00      | 78.0             | 0.00164 | -15.7                            | 8.4                                | -1.988510247 | 0.083350926  | MVZ.Mamm:231427 | yes                    |
| FMM.128  | SA          | Argentina | Ushuaia    | -54.78588 | -68.2755667  | 95.40        | M   | 13.00      | 85.0             | 0.00180 | -21.8                            | 11.0                               | -1.988510247 | 0.083350926  | MVZ.Mamm:231428 | yes                    |
| FMM.129  | SA          | Argentina | Ushuaia    | -54.79723 | -68.2292667  | 25.91        | F   | 13.00      | 87.0             | 0.00172 | -21.8                            | 7.6                                | -1.988510247 | 0.083350926  | MVZ.Mamm:231429 | yes                    |
| FMM.130  | SA          | Argentina | Ushuaia    | -54.79723 | -68.2292667  | 25.91        | F   | 15.00      | 102.0            | 0.00144 | -21.9                            | 7.2                                | -1.988510247 | 0.083350926  | MVZ.Mamm:231430 | yes                    |
| FMM.132  | SA          | Argentina | Gaiman     | -43.34011 | -65.52680556 | 3.05         | F   | 18.00      | 91.0             | 0.00217 | -21.2                            | 7.4                                | -1.903374715 | -2.40651917  | MVZ.Mamm:231412 | yes                    |
| FMM.133  | SA          | Argentina | Gaiman     | -43.32986 | -65.53155556 | 4.88         | M   | 16.50      | 91.0             | 0.00199 | -23.2                            | 11.6                               | -1.660504395 | -2.583736438 | MVZ.Mamm:231413 | yes                    |
| FMM.135  | SA          | Argentina | Gaiman     | -43.33275 | -65.54722222 | 3.96         | M   | 5.50       | 71.0             | 0.00109 | -17.2                            | 11.4                               | -1.660504395 | -2.583736438 | MVZ.Mamm:231415 | yes                    |
| FMM.137  | SA          | Argentina | Gaiman     | -43.31217 | -65.47452778 | 3.96         | M   | 10.75      | 85.0             | 0.00149 | -14.8                            | 7.2                                | -1.834905812 | -2.388038402 | MVZ.Mamm:231417 | yes                    |
| FMM.138  | SA          | Argentina | Gaiman     | -43.32519 | -65.54222222 | 15.85        | F   | 14.75      | 94.0             | 0.00167 | -13.8                            | 7.2                                | -1.660504395 | -2.583736438 | MVZ.Mamm:231418 | yes                    |
| FMM.139  | SA          | Argentina | Gaiman     | -43.33089 | -65.48286111 | 3.05         | F   | 14.25      | 88.0             | 0.00184 | -20.8                            | 9.8                                | -1.834905812 | -2.388038402 | MVZ.Mamm:231419 | yes                    |
| FMM.141  | SA          | Argentina | Gaiman     | -43.31078 | -65.40872222 | 9.14         | F   | 24.00      | 90.0             | 0.00296 | -14.2                            | 7.7                                | -1.834905812 | -2.388038402 | MVZ.Mamm:231421 | yes                    |
| FMM.142  | SA          | Argentina | Gaiman     | -43.29569 | -65.40025    | 3.05         | M   | 13.00      | 93.0             | 0.00150 | -19.2                            | 10.6                               | -1.834905812 | -2.388038402 | MVZ.Mamm:231422 | yes                    |
| FMM.143  | SA          | Argentina | Gaiman     | -43.32731 | -65.37475    | 9.14         | M   | 18.00      | 90.0             | 0.00222 | -20.3                            | 11.1                               | -1.834905812 | -2.388038402 | MVZ.Mamm:231423 | yes                    |
| FMM.144  | SA          | Argentina | Gaiman     | -43.34189 | -66.56788889 | 9.14         | F   | 17.50      | 93.0             | 0.00202 | -12.7                            | 8.7                                | -1.75568226  | -2.543714464 | MVZ.Mamm:231424 | yes                    |
| FMM.146  | SA          | Argentina | Tandil     | -37.81997 | -58.24201667 | 131.98       | M   | 8.00       | 75.0             | 0.00142 | -14.7                            | 6.8                                | 0.149955372  | 0.262889409  | MVZ.Mamm:231395 | yes                    |
| FMM.147  | SA          | Argentina | Tandil     | -37.76057 | -59.29883333 | 111.86       | M   | 19.00      | 98.0             | 0.00198 | -23.4                            | 9.2                                | -0.066562831 | -0.084031806 | MVZ.Mamm:231396 | yes                    |
| FMM.148  | SA          | Brazil    | Maringa    | -23.44993 | -51.99877778 | 554.74       | M   | 11.50      | 85.0             | 0.00166 | -10.3                            | 6.9                                | NA           | NA           | MVZ.Mamm:231351 | no                     |
| FMM.149  | SA          | Brazil    | Maringa    | -23.46181 | -52.00411111 | 554.74       | M   | 13.50      | 84.0             | 0.00191 | -19.4                            | 4.9                                | 3.183810797  | 0.835052031  | MVZ.Mamm:231352 | yes                    |
| FMM.150  | SA          | Brazil    | Maringa    | -23.45331 | -51.99877778 | 533.10       | F   | 11.50      | 79.0             | 0.00184 | -12.6                            | 6.8                                | 3.106302703  | 0.712909087  | MVZ.Mamm:231353 | yes                    |
| FMM.152  | SA          | Brazil    | Maringa    | -23.46181 | -52.02728056 | 546.51       | M   | 14.50      | 84.0             | 0.00206 | -10.4                            | 6.3                                | 3.183810797  | 0.835052031  | MVZ.Mamm:231355 | yes                    |
| FMM.154  | SA          | Brazil    | Maringa    | -23.42272 | -51.96297222 | 573.33       | M   | 18.75      | 93.0             | 0.00217 | -16.5                            | 9.8                                | 3.106302703  | 0.712909087  | MVZ.Mamm:231356 | yes                    |
| FMM.155  | SA          | Brazil    | Maringa    | -23.43103 | -51.97188889 | 584.61       | M   | 14.75      | 86.0             | 0.00199 | -15.9                            | 9.8                                | 3.106302703  | 0.712909087  | MVZ.Mamm:231357 | yes                    |
| FMM.156  | SA          | Brazil    | Maringa    | -23.42072 | -51.95277778 | 556.26       | M   | 14.25      | 89.0             | 0.00180 | -22.7                            | 7.7                                | 3.106302703  | 0.712909087  | MVZ.Mamm:231358 | yes                    |
| FMM.157  | SA          | Brazil    | Maringa    | -23.45356 | -51.91233333 | 538.89       | F   | 13.00      | 93.0             | 0.00150 | -12.4                            | 10.4                               | 3.106302703  | 0.712909087  | MVZ.Mamm:231359 | yes                    |
| FMM.159  | SA          | Brazil    | Maringa    | -23.39992 | -51.92452778 | 553.82       | F   | 8.00       | 85.0             | 0.00111 | -19.6                            | 7.3                                | 3.106302703  | 0.712909087  | MVZ.Mamm:231361 | yes                    |
| FMM.160  | SA          | Brazil    | Maringa    | -23.38592 | -51.913175   | 508.41       | F   | 15.00      | 89.0             | 0.00189 | -16.5                            | 7.0                                | 3.106302703  | 0.712909087  | MVZ.Mamm:231362 | yes                    |
| FMM.162  | SA          | Brazil    | Uruguaiana | -29.89547 | -57.13158333 | 49.38        | F   | 14.00      | 95.0             | 0.00155 | -20.9                            | 11.8                               | 2.292591849  | 0.887842175  | MVZ.Mamm:231364 | yes                    |
| FMM.163  | SA          | Brazil    | Uruguaiana | -29.87089 | -57.18852778 | 39.93        | M   | 13.50      | 83.0             | 0.00196 | -23.9                            | 7.8                                | 2.473543145  | 1.242012644  | MVZ.Mamm:231365 | yes                    |
| FMM.165  | SA          | Brazil    | Uruguaiana | -29.89144 | -57.23458333 | 44.20        | M   | 14.00      | 83.0             | 0.00203 | -25.4                            | 11.0                               | 2.473543145  | 1.242012644  | MVZ.Mamm:231367 | yes                    |
| FMM.166  | SA          | Brazil    | Uruguaiana | -29.88203 | -57.17661111 | 61.26        | F   | 24.50      | 98.0             | 0.00255 | -21.8                            | 10.0                               | 2.473543145  | 1.242012644  | MVZ.Mamm:231368 | yes                    |
| FMM.167  | SA          | Brazil    | Uruguaiana | -29.87442 | -57.13488889 | 66.75        | F   | 16.75      | 92.0             | 0.00198 | -14.0                            | 15.1                               | 2.292591849  | 0.887842175  | MVZ.Mamm:231369 | yes                    |
| FMM.168  | SA          | Brazil    | Uruguaiana | -29.89203 | -57.20069444 | 76.50        | F   | 12.00      | 80.0             | 0.00188 | -24.5                            | 6.1                                | 2.473543145  | 1.242012644  | MVZ.Mamm:231370 | yes                    |
| FMM.169  | SA          | Brazil    | Uruguaiana | -29.88631 | -57.18655556 | 81.99        | F   | 13.00      | 83.0             | 0.00189 | -25.5                            | 10.4                               | 2.473543145  | 1.242012644  | MVZ.Mamm:231371 | yes                    |
| FMM.173  | SA          | Brazil    | Uruguaiana | -29.81714 | -57.20108333 | 57.91        | M   | 11.25      | 80.0             | 0.00176 | -14.6                            | 11.2                               | 2.655419936  | 1.556698111  | MVZ.Mamm:231375 | yes                    |
| FMM.176  | SA          | Brazil    | Uruguaiana | -29.82919 | -57.19994444 | 73.76        | M   | 18.00      | 105.0            | 0.00163 | -17.3                            | 11.5                               | 2.655419936  | 1.556698111  | MVZ.Mamm:231377 | yes                    |
| FMM.179  | SA          | Brazil    | Uruguaiana | -29.90678 | -57.15466667 | 107.29       | F   | 14.00      | 99.0             | 0.00143 | -22.2                            | 9.0                                | 2.292591849  | 0.887842175  | MVZ.Mamm:231380 | yes                    |
| FMM.266  | SA          | Brazil    | orto_Velch | -8.77153  | -63.80286111 | 91.74        | F   | 12.50      | 89.0             | 0.00158 | -18.4                            | 9.4                                | 6.844630433  | -1.214203297 | MVZ.Mamm:231392 | yes                    |
| FMM.267  | SA          | Brazil    | orto_Velch | -8.78411  | -63.84161111 | 93.88        | M   | 10.00      | 83.0             | 0.00145 | -20.1                            | 9.8                                | 6.88431953   | -0.53607707  | MVZ.Mamm:231381 | yes                    |
| FMM.268  | SA          | Brazil    | orto_Velch | -8.77156  | -63.79761111 | 97.23        | M   | 12.25      | 83.0             | 0.00178 | -20.0                            | 9.5                                | 6.844630433  | -1.214203297 | MVZ.Mamm:231382 | yes                    |
| FMM.269  | SA          | Brazil    | orto_Velch | -8.78253  | -63.84572222 | 82.60        | F   | 13.75      | 91.0             | 0.00166 | -20.0                            | 10.1                               | 6.88431953   | -0.53607707  | MVZ.Mamm:231383 | yes                    |
| FMM.270  | SA          | Brazil    | orto_Velch | -8.77792  | -63.84147222 | 71.63        | F   | 15.00      | 96.0             | 0.00163 | -16.3                            | 8.1                                | 6.88431953   | -0.53607707  | MVZ.Mamm:231384 | yes                    |
| FMM.271  | SA          | Brazil    | orto_Velch | -8.7645   | -63.83977778 | 77.11        | F   | 12.25      | 87.0             | 0.00162 | -24.0                            | 9.9                                | 6.88431953   | -0.53607707  | MVZ.Mamm:231385 | yes                    |
| FMM.274  | SA          | Brazil    | orto_Velch | -8.77716  | -63.84456389 | 85.04        | F   | 16.25      | 100.0            | 0.00163 | -17.2                            | 8.1                                | NA           | NA           | MVZ.Mamm:231390 | no                     |
| FMM.277  | SA          | Brazil    | orto_Velch | -8.78278  | -63.85197222 | 87.78        | M   | 7.00       | 78.0             | 0.00115 | -16.9                            | 8.4                                | 6.88431953   | -0.53607707  | MVZ.Mamm:231389 | yes                    |
| FMM.278  | SA          | Brazil    | orto_Velch | -8.78431  | -63.80325    | 87.78        | F   | 13.00      | 85.0             | 0.00180 | -16.2                            | 7.7                                | 6.844630433  | -1.214203297 | MVZ.Mamm:231393 | yes                    |
| FMM.279  | SA          | Brazil    | orto_Velch | -8.77625  | -63.80039167 | 85.95        | F   | 14.00      | 94.0             | 0.00158 | -23.6                            | 10.6                               | 6.844630433  | -1.214203297 | MVZ.Mamm:231394 | yes                    |
| FMM.280  | SA          | Brazil    | Brasilia   | -15.94933 | -47.93558611 | 1081.74      | F   | 14.50      | 93.0             | 0.00168 | -19.9                            | 7.9                                | 5.072092141  | -2.263997717 | MVZ.Mamm:231335 | yes                    |
| FMM.282  | SA          | Brazil    | Brasilia   | -15.6433  | -47.91583889 | 1264.01      | M   | 11.25      | 79.0             | 0.00180 | -9.9                             | 8.0                                | 4.443718995  | -3.12540741  | MVZ.Mamm:231342 | yes                    |
| FMM.284  | SA          | Brazil    | Brasilia   | -15.63792 | -47.91805556 | 1251.51      | F   | 8.00       | 70.0             | 0.00163 | -11.3                            | 9.6                                | 4.443718995  | -3.12540741  | MVZ.Mamm:231344 | yes                    |
| FMM.285  | SA          | Brazil    | Brasilia   | -15.62348 | -47.92898333 | 1249.07      | M   | 8.75       | 71.0             | 0.00174 | -9.5                             | 12.6                               | 4.443718995  | -3.12540741  | MVZ.Mamm:231345 | yes                    |
| FMM.286  | SA          | Brazil    | Brasilia   | -15.62107 | -47.94668333 | 1207.92      | F   | 14.25      | 99.0             | 0.00145 | -12.5                            | 7.7                                | 4.443718995  | -3.12540741  | MVZ.Mamm:231346 | yes                    |
| FMM.287  | SA          | Brazil    | Brasilia   | -15.94658 | -47.94034722 | 1075.94      | M   | 6.25       | 62.0             | 0.00163 | -18.6                            | 9.0                                | 5.072092141  | -2.263997717 | MVZ.Mamm:231336 | yes                    |
| FMM.288  | SA          | Brazil    | Brasilia   | -15.94516 | -47.9314     | 1085.70      | F   | 15.50      | 93.0             | 0.00179 | -18.1                            | 7.1                                | 5.072092141  | -2.263997717 | MVZ.Mamm:231337 | yes                    |
| FMM.291  | SA          | Brazil    | Brasilia   | -15.94004 | -47.94055833 | 1058.88      | F   | 12.00      | 89.0             | 0.00152 | -19.2                            | 5.2                                | 5.072092141  | -2.263997717 | MVZ.Mamm:231340 | yes                    |
| FMM.292  | SA          | Brazil    | Brasilia   | -15.60442 | -47.96889722 | 1228.95      | F   | 10.50      | 87.0             | 0.00139 | -14.2                            | 7.3                                | 4.443718995  | -3.12540741  | MVZ.Mamm:231347 | yes                    |
| FMM.294  | SA          | Brazil    | Brasilia   | -15.58061 | -48.01786111 | 1263.40      | M   | 11.00      | 76.0             | 0.00190 | -12.3                            | 6.9                                | 4.401702121  | -2.997374681 | MVZ.Mamm:231349 | yes                    |

\* Samples were excluded from all analyses when the samples had < 5500 reads per sample.

**Table S2.** Eigenvalues and eigenvectors for climate PC1 and PC2

|               |                                                                   | Climate PC1    | Climate PC2    |
|---------------|-------------------------------------------------------------------|----------------|----------------|
|               |                                                                   | Eigenvalues    | 4.12           |
|               |                                                                   | Percent (%)    | 21.69          |
| Eigenvectors* | BIO1 = Annual Mean Temperature                                    | <b>0.30244</b> | -0.06015       |
|               | BIO2 = Mean Diurnal Range (Mean of monthly (max temp - min temp)) | -0.12879       | -0.16405       |
|               | BIO3 = Isothermality (BIO2/BIO7) ( $\times 100$ )                 | 0.27784        | -0.19438       |
|               | BIO4 = Temperature Seasonality (standard deviation $\times 100$ ) | -0.27382       | 0.12780        |
|               | BIO5 = Max Temperature of Warmest Month                           | 0.12532        | -0.04359       |
|               | BIO6 = Min Temperature of Coldest Month                           | <b>0.30884</b> | -0.08821       |
|               | BIO7 = Temperature Annual Range (BIO5-BIO6)                       | -0.26735       | 0.07215        |
|               | BIO8 = Mean Temperature of Wettest Quarter                        | 0.21223        | 0.09011        |
|               | BIO9 = Mean Temperature of Driest Quarter                         | 0.21923        | -0.21119       |
|               | BIO10 = Mean Temperature of Warmest Quarter                       | 0.20370        | 0.00978        |
|               | BIO11 = Mean Temperature of Coldest Quarter                       | <b>0.31154</b> | -0.09765       |
|               | BIO12 = Annual Precipitation                                      | 0.27584        | 0.21048        |
|               | BIO13 = Precipitation of Wettest Month                            | 0.29447        | 0.06152        |
|               | BIO14 = Precipitation of Driest Month                             | 0.01928        | <b>0.47595</b> |
|               | BIO15 = Precipitation Seasonality (Coefficient of Variation)      | 0.13626        | -0.30192       |
|               | BIO16 = Precipitation of Wettest Quarter                          | 0.29263        | 0.06653        |
|               | BIO17 = Precipitation of Driest Quarter                           | 0.04953        | <b>0.47463</b> |
|               | BIO18 = Precipitation of Warmest Quarter                          | 0.20368        | 0.28908        |
|               | BIO19 = Precipitation of Coldest Quarter                          | 0.11932        | <b>0.39886</b> |

\* The top three climatic variables that have the highest eigenvectors are bolded for PC1 and PC2.

# MOLECULAR ECOLOGY

**Table S3.** Sample information of lab-reared individuals (n=120). (continued)

| SampleID | Colony       | Sex | Weight (g) | Carbon ( $\delta^{13}\text{C}$ ) | Nitrogen ( $\delta^{15}\text{N}$ ) | Included in analyses? |
|----------|--------------|-----|------------|----------------------------------|------------------------------------|-----------------------|
| NY01F1   | New_York_Lab | F   | 17.8       | -19.051485                       | 6.38205111                         | yes                   |
| NY01F2   | New_York_Lab | F   | 17.9       | -19.051485                       | 6.38205111                         | yes                   |
| NY01M1   | New_York_Lab | M   | 20.1       | -19.051485                       | 6.38205111                         | yes                   |
| NY01M2   | New_York_Lab | M   | 21.5       | -19.051485                       | 6.38205111                         | yes                   |
| NY02F1   | New_York_Lab | F   | 13.5       | -19.051485                       | 6.38205111                         | yes                   |
| NY02F2   | New_York_Lab | F   | 16.8       | -19.051485                       | 6.38205111                         | yes                   |
| NY02M1   | New_York_Lab | M   | 21.0       | -19.051485                       | 6.38205111                         | yes                   |
| NY02M2   | New_York_Lab | M   | 24.8       | -19.051485                       | 6.38205111                         | yes                   |
| NY03F1   | New_York_Lab | F   | 17.9       | -19.051485                       | 6.38205111                         | yes                   |
| NY03F2   | New_York_Lab | F   | 22.1       | -19.051485                       | 6.38205111                         | yes                   |
| NY03M1   | New_York_Lab | M   | 20.1       | -19.051485                       | 6.38205111                         | yes                   |
| NY03M2   | New_York_Lab | M   | 22.0       | -19.051485                       | 6.38205111                         | yes                   |
| NY04F1   | New_York_Lab | F   | 16.4       | -19.051485                       | 6.38205111                         | yes                   |
| NY04F2   | New_York_Lab | F   | 17.8       | -19.051485                       | 6.38205111                         | yes                   |
| NY04M1   | New_York_Lab | M   | 22.6       | -19.051485                       | 6.38205111                         | yes                   |
| NY04M2   | New_York_Lab | M   | 23.9       | -19.051485                       | 6.38205111                         | yes                   |
| NY05F1   | New_York_Lab | F   | 17.5       | -19.051485                       | 6.38205111                         | yes                   |
| NY05M1   | New_York_Lab | M   | 23.4       | -19.051485                       | 6.38205111                         | yes                   |
| NY05M2   | New_York_Lab | M   | 25.1       | -19.051485                       | 6.38205111                         | yes                   |
| NY05M3   | New_York_Lab | M   | 21.9       | -19.051485                       | 6.38205111                         | yes                   |
| NY06F1   | New_York_Lab | F   | 15.0       | -19.051485                       | 6.38205111                         | yes                   |
| NY06F2   | New_York_Lab | F   | 16.5       | -19.051485                       | 6.38205111                         | yes                   |
| NY06M1   | New_York_Lab | M   | 24.2       | -19.051485                       | 6.38205111                         | yes                   |
| NY06M2   | New_York_Lab | M   | 25.2       | -19.051485                       | 6.38205111                         | yes                   |
| NY07F1   | New_York_Lab | F   | 20.1       | -19.051485                       | 6.38205111                         | yes                   |
| NY07F2   | New_York_Lab | F   | 20.0       | -19.051485                       | 6.38205111                         | yes                   |
| NY07M1   | New_York_Lab | M   | 20.9       | -19.051485                       | 6.38205111                         | yes                   |
| NY07M2   | New_York_Lab | M   | 24.8       | -19.051485                       | 6.38205111                         | yes                   |
| NY08F1   | New_York_Lab | F   | 13.8       | -19.051485                       | 6.38205111                         | yes                   |
| NY08F2   | New_York_Lab | F   | 15.0       | -19.051485                       | 6.38205111                         | yes                   |
| NY08M1   | New_York_Lab | M   | 17.0       | -19.051485                       | 6.38205111                         | yes                   |
| NY08M2   | New_York_Lab | M   | 16.2       | -19.051485                       | 6.38205111                         | yes                   |
| NY09F1   | New_York_Lab | F   | 21.1       | -19.051485                       | 6.38205111                         | yes                   |
| NY09F2   | New_York_Lab | F   | 23.2       | -19.051485                       | 6.38205111                         | yes                   |
| NY09M1   | New_York_Lab | M   | 24.5       | -19.051485                       | 6.38205111                         | yes                   |
| NY09M2   | New_York_Lab | M   | 27.0       | -19.051485                       | 6.38205111                         | yes                   |
| NY10F1   | New_York_Lab | F   | 17.0       | -19.051485                       | 6.38205111                         | yes                   |
| NY10F2   | New_York_Lab | F   | 20.9       | -19.051485                       | 6.38205111                         | yes                   |
| NY10M1   | New_York_Lab | M   | 24.2       | -19.051485                       | 6.38205111                         | yes                   |
| NY10M2   | New_York_Lab | M   | 25.5       | -19.051485                       | 6.38205111                         | yes                   |
| BR01F1   | Brazil_Lab   | F   | 14.7       | -18.90751                        | 6.19754486                         | yes                   |
| BR01F2   | Brazil_Lab   | F   | 15.2       | -18.90751                        | 6.19754486                         | yes                   |
| BR01M1   | Brazil_Lab   | M   | 16.5       | -18.90751                        | 6.19754486                         | yes                   |
| BR01M2   | Brazil_Lab   | M   | 15.5       | -18.90751                        | 6.19754486                         | yes                   |
| BR02F1   | Brazil_Lab   | F   | 13.5       | -18.90751                        | 6.19754486                         | yes                   |
| BR02F2   | Brazil_Lab   | F   | 10.1       | -18.90751                        | 6.19754486                         | yes                   |
| BR02F3   | Brazil_Lab   | F   | 13.2       | -18.90751                        | 6.19754486                         | yes                   |
| BR02M1   | Brazil_Lab   | M   | 15.8       | -18.90751                        | 6.19754486                         | yes                   |
| BR03F1   | Brazil_Lab   | F   | 12.6       | -18.90751                        | 6.19754486                         | yes                   |
| BR03F2   | Brazil_Lab   | F   | 12.4       | -18.90751                        | 6.19754486                         | yes                   |
| BR03M1   | Brazil_Lab   | M   | 16.1       | -18.90751                        | 6.19754486                         | yes                   |
| BR03M2   | Brazil_Lab   | M   | 17.9       | -18.90751                        | 6.19754486                         | yes                   |
| BR04F1   | Brazil_Lab   | F   | 9.5        | -18.90751                        | 6.19754486                         | yes                   |
| BR04F2   | Brazil_Lab   | F   | 15.2       | -18.90751                        | 6.19754486                         | yes                   |
| BR04M1   | Brazil_Lab   | M   | 15.5       | -18.90751                        | 6.19754486                         | yes                   |
| BR04M2   | Brazil_Lab   | M   | 16.0       | -18.90751                        | 6.19754486                         | yes                   |
| BR05F1   | Brazil_Lab   | F   | 10.0       | -18.90751                        | 6.19754486                         | yes                   |
| BR05F2   | Brazil_Lab   | F   | 12.9       | -18.90751                        | 6.19754486                         | yes                   |
| BR05F3   | Brazil_Lab   | F   | 12.2       | -18.90751                        | 6.19754486                         | yes                   |

\* Samples were excluded from all analyses when the samples had < 5500 reads per sample.

# MOLECULAR ECOLOGY

**Table S3.** Sample information of lab-reared individuals (n=120). (continued)

| SampleID | Colony      | Sex | Weight (g) | Carbon ( $\delta^{13}\text{C}$ ) | Nitrogen ( $\delta^{15}\text{N}$ ) | Included in analyses? |
|----------|-------------|-----|------------|----------------------------------|------------------------------------|-----------------------|
| BR05M1   | Brazil_Lab  | M   | 12.5       | -18.90751                        | 6.19754486                         | yes                   |
| BR06F1   | Brazil_Lab  | F   | 12.0       | -18.90751                        | 6.19754486                         | yes                   |
| BR06F2   | Brazil_Lab  | F   | 12.9       | -18.90751                        | 6.19754486                         | yes                   |
| BR06M1   | Brazil_Lab  | M   | 15.5       | -18.90751                        | 6.19754486                         | yes                   |
| BR06M2   | Brazil_Lab  | M   | 15.1       | -18.90751                        | 6.19754486                         | yes                   |
| BR07F1   | Brazil_Lab  | F   | 13.1       | -18.90751                        | 6.19754486                         | no                    |
| BR07F2   | Brazil_Lab  | F   | 10.5       | -18.90751                        | 6.19754486                         | yes                   |
| BR07F3   | Brazil_Lab  | F   | 10.1       | -18.90751                        | 6.19754486                         | yes                   |
| BR07M1   | Brazil_Lab  | M   | 14.2       | -18.90751                        | 6.19754486                         | yes                   |
| BR08F1   | Brazil_Lab  | F   | 12.1       | -18.90751                        | 6.19754486                         | yes                   |
| BR08F2   | Brazil_Lab  | F   | 13.3       | -18.90751                        | 6.19754486                         | yes                   |
| BR08M1   | Brazil_Lab  | M   | 17.5       | -18.90751                        | 6.19754486                         | no                    |
| BR08M2   | Brazil_Lab  | M   | 12.5       | -18.90751                        | 6.19754486                         | yes                   |
| BR09F1   | Brazil_Lab  | F   | 12.6       | -18.90751                        | 6.19754486                         | yes                   |
| BR09F2   | Brazil_Lab  | F   | 13.0       | -18.90751                        | 6.19754486                         | yes                   |
| BR09F3   | Brazil_Lab  | F   | 14.0       | -18.90751                        | 6.19754486                         | yes                   |
| BR09M1   | Brazil_Lab  | M   | 16.4       | -18.90751                        | 6.19754486                         | yes                   |
| BR10F1   | Brazil_Lab  | F   | 11.8       | -18.90751                        | 6.19754486                         | yes                   |
| BR10F2   | Brazil_Lab  | F   | 9.5        | -18.90751                        | 6.19754486                         | yes                   |
| BR10M1   | Brazil_Lab  | M   | 15.6       | -18.90751                        | 6.19754486                         | yes                   |
| BR10M2   | Brazil_Lab  | M   | 15.0       | -18.90751                        | 6.19754486                         | yes                   |
| FL01F1   | Florida_Lab | F   | 16.6       | -18.977084                       | 6.68198582                         | yes                   |
| FL01F2   | Florida_Lab | F   | 19.0       | -18.977084                       | 6.68198582                         | yes                   |
| FL01M1   | Florida_Lab | M   | 23.6       | -18.977084                       | 6.68198582                         | yes                   |
| FL01M2   | Florida_Lab | M   | 21.0       | -18.977084                       | 6.68198582                         | yes                   |
| FL02F1   | Florida_Lab | F   | 15.7       | -18.977084                       | 6.68198582                         | yes                   |
| FL02F2   | Florida_Lab | F   | 16.2       | -18.977084                       | 6.68198582                         | yes                   |
| FL02M1   | Florida_Lab | M   | 20.2       | -18.977084                       | 6.68198582                         | yes                   |
| FL02M2   | Florida_Lab | M   | 23.5       | -18.977084                       | 6.68198582                         | yes                   |
| FL03F1   | Florida_Lab | F   | 17.5       | -18.977084                       | 6.68198582                         | yes                   |
| FL03F2   | Florida_Lab | F   | 20.5       | -18.977084                       | 6.68198582                         | yes                   |
| FL03M1   | Florida_Lab | M   | 25.0       | -18.977084                       | 6.68198582                         | yes                   |
| FL03M2   | Florida_Lab | M   | 27.2       | -18.977084                       | 6.68198582                         | yes                   |
| FL04F1   | Florida_Lab | F   | 12.9       | -18.977084                       | 6.68198582                         | yes                   |
| FL04F2   | Florida_Lab | F   | 15.5       | -18.977084                       | 6.68198582                         | yes                   |
| FL04M1   | Florida_Lab | M   | 20.0       | -18.977084                       | 6.68198582                         | yes                   |
| FL04M2   | Florida_Lab | M   | 20.9       | -18.977084                       | 6.68198582                         | yes                   |
| FL05F1   | Florida_Lab | F   | 11.9       | -18.977084                       | 6.68198582                         | yes                   |
| FL05F2   | Florida_Lab | F   | 11.8       | -18.977084                       | 6.68198582                         | yes                   |
| FL05M1   | Florida_Lab | M   | 19.5       | -18.977084                       | 6.68198582                         | yes                   |
| FL05M2   | Florida_Lab | M   | 15.8       | -18.977084                       | 6.68198582                         | yes                   |
| FL06F1   | Florida_Lab | F   | 16.1       | -18.977084                       | 6.68198582                         | yes                   |
| FL06F2   | Florida_Lab | F   | 12.5       | -18.977084                       | 6.68198582                         | yes                   |
| FL06M1   | Florida_Lab | M   | 19.2       | -18.977084                       | 6.68198582                         | yes                   |
| FL06M2   | Florida_Lab | M   | 14.2       | -18.977084                       | 6.68198582                         | yes                   |
| FL07F1   | Florida_Lab | F   | 13.5       | -18.977084                       | 6.68198582                         | yes                   |
| FL07F2   | Florida_Lab | F   | 15.6       | -18.977084                       | 6.68198582                         | yes                   |
| FL07M1   | Florida_Lab | M   | 15.4       | -18.977084                       | 6.68198582                         | yes                   |
| FL07M2   | Florida_Lab | M   | 16.9       | -18.977084                       | 6.68198582                         | yes                   |
| FL08F1   | Florida_Lab | F   | 18.5       | -18.977084                       | 6.68198582                         | yes                   |
| FL08F2   | Florida_Lab | F   | 22.0       | -18.977084                       | 6.68198582                         | yes                   |
| FL08M1   | Florida_Lab | M   | 21.1       | -18.977084                       | 6.68198582                         | no                    |
| FL08M2   | Florida_Lab | M   | 21.5       | -18.977084                       | 6.68198582                         | no                    |
| FL09F1   | Florida_Lab | F   | 15.0       | -18.977084                       | 6.68198582                         | yes                   |
| FL09F2   | Florida_Lab | F   | 13.0       | -18.977084                       | 6.68198582                         | yes                   |
| FL09M1   | Florida_Lab | M   | 17.5       | -18.977084                       | 6.68198582                         | yes                   |
| FL09M2   | Florida_Lab | M   | 20.1       | -18.977084                       | 6.68198582                         | yes                   |
| FL10F1   | Florida_Lab | F   | 15.5       | -18.977084                       | 6.68198582                         | yes                   |
| FL10F2   | Florida_Lab | F   | 15.0       | -18.977084                       | 6.68198582                         | yes                   |
| FL10M1   | Florida_Lab | M   | 18.8       | -18.977084                       | 6.68198582                         | yes                   |
| FL10M2   | Florida_Lab | M   | 18.4       | -18.977084                       | 6.68198582                         | yes                   |

\* Samples were excluded from all analyses when the samples had < 5500 reads per sample.

# MOLECULAR ECOLOGY

**Table S4.** Samples selected for characterizing levels of SCFAs (100 - 112 day old animals).

| Origin                          | Source latitude | Line ID | Sex | n | Age (days) |     |
|---------------------------------|-----------------|---------|-----|---|------------|-----|
|                                 |                 |         |     |   | Mean       | SD  |
| Edmonton, Alberta, Canada       | 53.546          | EDM     | M   | 5 | 106.6      | 3.8 |
| Saratoga Springs, New York, USA | 43.083          | SAR     | M   | 7 | 106.4      | 3.9 |
| Tucson, Arizona, USA            | 32.223          | TUC     | M   | 6 | 105.0      | 4.3 |
| Gainesville, Florida, USA       | 29.652          | GAI     | M   | 7 | 106.9      | 4.1 |
| Manaus, Amazonas, Brazil        | -3.119          | MAN     | M   | 7 | 106.6      | 3.3 |



# MOLECULAR ECOLOGY

**Table S5.** Associations between Bray-Curtis dissimilarity and variables using 100% and 94% OTUs based on ADONIS.

| Variables   | 100% OTUs (ASVs) |          |                |          | 94% OTUs       |          |                |          |
|-------------|------------------|----------|----------------|----------|----------------|----------|----------------|----------|
|             | Independent*     |          | Nested*        |          | Independent*   |          | Nested*        |          |
|             | R <sup>2</sup>   | P-value  | R <sup>2</sup> | P-value  | R <sup>2</sup> | P-value  | R <sup>2</sup> | P-value  |
| BMI         | 0.023            | < 0.0001 | 0.019          | < 0.0001 | 0.032          | < 0.0001 | 0.028          | < 0.0001 |
| Weight      | 0.014            | < 0.0001 | 0.009          | 0.0019   | 0.017          | 0.0002   | 0.014          | 0.0003   |
| Carbon      | 0.011            | 0.0016   | 0.011          | 0.0002   | 0.011          | 0.0289   | 0.011          | 0.0063   |
| Nitrogen    | 0.011            | 0.0014   | 0.008          | 0.0093   | 0.009          | 0.0714   | 0.007          | 0.1044   |
| Climate PC1 | 0.038            | < 0.0001 | 0.030          | < 0.0001 | 0.025          | < 0.0001 | 0.025          | < 0.0001 |
| Climate PC2 | 0.015            | < 0.0001 | 0.011          | 0.0004   | 0.018          | 0.0003   | 0.010          | 0.0081   |
| Locality2   | 0.222            | < 0.0001 | 0.171          | < 0.0001 | 0.252          | < 0.0001 | 0.198          | < 0.0001 |

\* ADONIS was ran independently for each of the variables (Independent) and including other variables as covariates (Nested)

# MOLECULAR ECOLOGY

**Table S6.** Correlations with absolute latitude and metadata.

| Variables             | All samples (n = 161) |         |        | East-NA (n = 49) |         |        | West-NA (n = 50) |         |        | SA (n = 62)  |         |        |
|-----------------------|-----------------------|---------|--------|------------------|---------|--------|------------------|---------|--------|--------------|---------|--------|
|                       | rho                   | p-value | FDR-p  | rho              | p-value | FDR-p  | rho              | p-value | FDR-p  | rho          | p-value | FDR-p  |
| Climate PC1           | <b>-0.91</b>          | <.0001  | <.0004 | <b>-0.97</b>     | <.0001  | <.0004 | <b>-0.87</b>     | <.0001  | <.0004 | <b>-0.98</b> | <.0001  | <.0004 |
| Climate PC2           | 0.08                  | 0.30    | 0.360  | <b>0.36</b>      | 0.011   | 0.029  | <b>0.85</b>      | <.0001  | <.0004 | 0.12         | 0.34    | 0.389  |
| Body weight           | <b>0.27</b>           | 0.0005  | 0.002  | <b>0.34</b>      | 0.016   | 0.038  | -0.28            | 0.061   | 0.113  | 0.26         | 0.045   | 0.090  |
| Body mass index (BMI) | <b>0.31</b>           | <.0001  | <.0004 | 0.26             | 0.073   | 0.125  | -0.17            | 0.26    | 0.328  | 0.18         | 0.15    | 0.225  |
| Diet (Carbon)         | <b>-0.19</b>          | 0.018   | 0.039  | 0.17             | 0.24    | 0.320  | <b>-0.37</b>     | 0.0088  | 0.026  | -0.21        | 0.11    | 0.176  |
| Diet (Nitrogen)       | -0.10                 | 0.21    | 0.296  | 0.09             | 0.55    | 0.600  | 0.00             | 0.98    | 0.980  | -0.01        | 0.95    | 0.980  |

Raw p-values and FDR corrected p-values are shown. Significant rho values are in bold based on FDR-corrected p-values.

# MOLECULAR ECOLOGY

**Table S7.** Correlations between climate PCs and body size measurements.

| Variables            | All samples (n = 161) |                  | East-NA (n = 49) |               | West-NA (n = 50) |         | SA (n = 62)  |               |
|----------------------|-----------------------|------------------|------------------|---------------|------------------|---------|--------------|---------------|
|                      | rho                   | p-value          | rho              | p-value       | rho              | p-value | rho          | p-value       |
| Climate PC1 x Weight | <b>-0.34</b>          | <b>&lt;.0001</b> | <b>-0.37</b>     | <b>0.0087</b> | 0.30             | 0.0439  | <b>-0.26</b> | <b>0.0407</b> |
| Climate PC1 x BMI    | <b>-0.36</b>          | <b>&lt;.0001</b> | -0.28            | 0.0506        | 0.19             | 0.2035  | -0.20        | 0.1166        |
| Climate PC2 x Weight | -0.04                 | 0.6477           | -0.10            | 0.5157        | -0.15            | 0.3161  | 0.16         | 0.2117        |
| Climate PC2 x BMI    | <b>0.26</b>           | <b>0.0009</b>    | 0.04             | 0.7948        | -0.04            | 0.7901  | 0.17         | 0.1861        |

# MOLECULAR ECOLOGY

**Table S8.** Correlations between predictor variables and Bray-Curtis dissimilarity within each transect using Mantel test.

| Predictor variables | East-NA (n = 49) |         |       | West-NA (n = 50) |         |       | SA (n = 62)  |         |        |
|---------------------|------------------|---------|-------|------------------|---------|-------|--------------|---------|--------|
|                     | Mantel r         | p-value | FDR-p | Mantel r         | p-value | FDR-p | Mantel r     | p-value | FDR-p  |
| Geographic distance | 0.088            | 0.033   | 0.089 | <b>0.148</b>     | 0.005   | 0.021 | <b>0.404</b> | < 0.001 | < 0.01 |
| Climate PC1         | 0.103            | 0.055   | 0.128 | <b>0.172</b>     | 0.005   | 0.021 | <b>0.425</b> | < 0.001 | < 0.01 |
| Climate PC2         | 0.079            | 0.198   | 0.297 | 0.105            | 0.033   | 0.089 | 0.029        | 0.465   | 0.574  |
| Body weight         | 0.085            | 0.151   | 0.264 | 0.173            | 0.034   | 0.089 | 0.082        | 0.254   | 0.356  |
| BMI                 | <b>0.197</b>     | 0.004   | 0.021 | 0.138            | 0.102   | 0.195 | 0.065        | 0.377   | 0.495  |
| Carbon              | 0.112            | 0.074   | 0.155 | 0.089            | 0.167   | 0.270 | -0.025       | 0.647   | 0.715  |
| Nitrogen            | 0.047            | 0.560   | 0.653 | 0.007            | 0.94    | 0.940 | -0.026       | 0.697   | 0.732  |

Raw p-values and FDR corrected p-values are shown. Significant rho values are in bold based on FDR-corrected p-values.

# MOLECULAR ECOLOGY

**Table S9.** Correlations between predictor variables and Bray-Curtis dissimilarity within each transect using Partial Mantel test controlling for geographic distance.

| Predictor variables | East-NA (n = 49) |         |       | West-NA (n = 50) |         |       | SA (n = 62) |         |       |
|---------------------|------------------|---------|-------|------------------|---------|-------|-------------|---------|-------|
|                     | Mantel r         | p-value | FDR-p | Mantel r         | p-value | FDR-p | Mantel r    | p-value | FDR-p |
| Climate PC1         | 0.057            | 0.170   | 0.306 | 0.105            | 0.079   | 0.221 | 0.146       | 0.011   | 0.099 |
| Climate PC2         | 0.044            | 0.235   | 0.353 | 0.027            | 0.333   | 0.428 | -0.013      | 0.605   | 0.641 |
| Body weight         | 0.075            | 0.098   | 0.221 | 0.177            | 0.022   | 0.132 | 0.084       | 0.128   | 0.256 |
| BMI                 | <b>0.192</b>     | 0.002   | 0.036 | 0.141            | 0.068   | 0.221 | 0.063       | 0.201   | 0.329 |
| Carbon              | 0.116            | 0.041   | 0.185 | 0.084            | 0.094   | 0.221 | -0.024      | 0.682   | 0.682 |
| Nitrogen            | 0.042            | 0.292   | 0.404 | 0.021            | 0.382   | 0.440 | 0.012       | 0.391   | 0.440 |

Raw p-values and FDR corrected p-values are shown. Significant rho values are in bold based on FDR-corrected p-values.

# MOLECULAR ECOLOGY

**Table S10.** Repeated associations between microbial measurements and latitude.

| Microbial measurements <sup>1</sup>                                                                                                                   | Spearman rho correlation with latitude |          |                  |         |                  |         |             |          | Fisher's combined p-value |               |
|-------------------------------------------------------------------------------------------------------------------------------------------------------|----------------------------------------|----------|------------------|---------|------------------|---------|-------------|----------|---------------------------|---------------|
|                                                                                                                                                       | All (n = 161)                          |          | East-NA (n = 49) |         | West-NA (n = 50) |         | SA (n = 62) |          | raw p-value               | FDR corrected |
|                                                                                                                                                       | rho                                    | p-value  | rho              | p-value | rho              | p-value | rho         | p-value  |                           |               |
| <b>1__Firmicutes_2__Clostridia_3__Clostridiales_4__Ruminococaceae_5__Ruminiclostridium_6__uncultured_bacterium</b>                                    | -0.3011                                | 0.0001   | -0.1654          | 0.2562  | -0.3210          | 0.0231  | -0.73855    | 7.31E-12 | 2.18E-11                  | 3.49E-10      |
| <b>1__Firmicutes_2__Clostridia_3__Clostridiales_4__Ruminococaceae_5__Oscillibacter_6__unidentified</b>                                                | -0.32428                               | 2.71E-05 | -0.1249          | 0.3925  | -0.2299          | 0.1082  | -0.68551    | 7.90E-10 | 1.06E-08                  | 8.48E-08      |
| <b>1__Firmicutes_2__Clostridia_3__Clostridiales_4__Ruminococaceae_5__Oscillibacter_6__uncultured_bacterium</b>                                        | -0.2828                                | 0.0003   | -0.1927          | 0.1846  | -0.0283          | 0.8451  | -0.68556    | 7.87E-10 | 3.49E-08                  | 1.86E-07      |
| <b>1__Firmicutes_2__Clostridia_3__Clostridiales_4__Ruminococaceae</b>                                                                                 | -0.3203                                | 3.44E-05 | -0.0665          | 0.6499  | -0.1392          | 0.3349  | -0.65412    | 8.15E-09 | 3.98E-07                  | 1.59E-06      |
| <b>1__Bacteroidetes_2__Bacteroidia_3__Bacteroidales_4__Bacteroidaceae_5__Bacteroides</b>                                                              | -0.1327                                | 0.0934   | -0.0507          | 0.7293  | -0.3565          | 0.0110  | -0.4317     | 0.0005   | 0.0003                    | 0.0011        |
| <b>1__Firmicutes_2__Clostridia_3__Clostridiales_4__Lachnospiraceae_5__Lachnospiraceae_NK4A136_group_6__uncultured_bacterium</b>                       | -0.1102                                | 0.1641   | -0.0633          | 0.6656  | -0.2882          | 0.0424  | -0.4153     | 0.0008   | 0.0015                    | 0.0041        |
| <b>1__Firmicutes_2__Clostridia_3__Clostridiales_4__Lachnospiraceae_5__uncultured_6__Clostridium_sp._Culture.41</b>                                    | -0.0391                                | 0.6223   | -0.2703          | 0.0604  | -0.0291          | 0.8412  | -0.4125     | 0.0009   | 0.0027                    | 0.0062        |
| <b>1__Bacteroidetes_2__Bacteroidia_3__Bacteroidales_4__Muribaculaceae_5__uncultured_Bacteroidales_bacterium_6__uncultured_Bacteroidales_bacterium</b> | -0.2638                                | 0.0007   | -0.3932          | 0.0052  | -0.2193          | 0.1260  | -0.1357     | 0.2928   | 0.0089                    | 0.0177        |
| <b>1__Firmicutes_2__Bacilli_3__Lactobacillales_4__Lactobacillaceae_5__Lactobacillus</b>                                                               | 0.1109                                 | 0.1614   | 0.1898           | 0.1914  | 0.2854           | 0.0445  | 0.1810      | 0.1592   | 0.0399                    | 0.0709        |
| <b>1__Bacteroidetes</b>                                                                                                                               | -0.1497                                | 0.0581   | -0.2732          | 0.0579  | -0.0061          | 0.9665  | -0.2553     | 0.0452   | 0.0628                    | 0.0917        |
| <b>1__Cyanobacteria</b>                                                                                                                               | 0.2639                                 | 0.0007   | 0.0367           | 0.8025  | 0.3952           | 0.0045  | 0.0496      | 0.7018   | 0.0631                    | 0.0917        |
| <b>1__Firmicutes_2__Clostridia_3__Clostridiales_4__Lachnospiraceae_5__Lachnospiraceae_UCG.001_6__uncultured_bacterium</b>                             | -0.2552                                | 0.0011   | -0.0056          | 0.9697  | -0.1392          | 0.3351  | -0.2762     | 0.0298   | 0.1586                    | 0.2115        |
| <b>1__Proteobacteria_2__Deltaproteobacteria_3__Desulfovibrionales_4__Desulfovibrionaceae_5__Desulfovibrio</b>                                         | -0.0734                                | 0.3547   | 0.2704           | 0.0602  | 0.0287           | 0.8431  | 0.0539      | 0.6773   | 0.3455                    | 0.4252        |
| <b>1__Deferribacteres_2__Deferribacteres_3__Deferribacterales_4__Deferribacteraceae_5__Mucispirillum_6__uncultured_bacterium</b>                      | -0.2275                                | 0.0037   | -0.0012          | 0.9935  | -0.1049          | 0.4686  | -0.2031     | 0.1133   | 0.4363                    | 0.4834        |
| <b>faith_pd (alpha-diversity)</b>                                                                                                                     | -0.0648                                | 0.4139   | 0.2053           | 0.1567  | 0.0339           | 0.8154  | 0.0989      | 0.4443   | 0.4531                    | 0.4834        |
| <b>1__Proteobacteria</b>                                                                                                                              | 0.0137                                 | 0.8632   | 0.0737           | 0.6146  | 0.1373           | 0.3417  | 0.0976      | 0.4506   | 0.5808                    | 0.5808        |

<sup>1</sup> 16 out of 58 microbial measurements are listed that showed consistent slopes across all three latitudinal transects. Microbial measurements in bold indicate significant correlation with latitude based on FDR corrected Fisher's combined p-value.

# MOLECULAR ECOLOGY

**Table S11.** Correlations between the log ratio of Firmicutes/Bacteroidetes (F/B ratio) and metadata in wild-caught and lab-reared individuals.

| Variables               | Wild          |         |                  |         |                  |         |             |         | Lab (n = 116) |         |
|-------------------------|---------------|---------|------------------|---------|------------------|---------|-------------|---------|---------------|---------|
|                         | All (n = 161) |         | East-NA (n = 49) |         | West-NA (n = 50) |         | SA (n = 62) |         | rho           | p-value |
|                         | rho           | p-value | rho              | p-value | rho              | p-value | rho         | p-value |               |         |
| Body weight             | 0.108         | 0.177   | 0.196            | 0.177   | 0.265            | 0.072   | -0.063      | 0.628   | 0.066         | 0.483   |
| Body weight (residual)* | -0.128        | 0.108   | -0.027           | 0.856   | -0.182           | 0.220   | -0.096      | 0.459   | NA            | NA      |
| BMI                     | 0.164         | 0.039   | 0.261            | 0.070   | 0.256            | 0.082   | -0.128      | 0.320   | NA            | NA      |
| BMI (residual)*         | 0.137         | 0.085   | 0.233            | 0.107   | 0.257            | 0.081   | -0.308      | 0.015   | NA            | NA      |
| Latitude                | 0.154         | 0.051   | 0.186            | 0.201   | -0.118           | 0.413   | 0.250       | 0.040   | NA            | NA      |

\* Correlation between log(F/B ratio) and residual values between body size measurements and latitude.

# MOLECULAR ECOLOGY

**Table S12.** Repeated associations between microbial measurements and residual body weight accounted for the effects of latitude.

| Microbial measurements <sup>1</sup>                                                                                                                | Spearman rho correlation with residual body weight |         |                  |         |                  |         |             |         | Fisher's combined p-value |               |
|----------------------------------------------------------------------------------------------------------------------------------------------------|----------------------------------------------------|---------|------------------|---------|------------------|---------|-------------|---------|---------------------------|---------------|
|                                                                                                                                                    | All (n = 161)                                      |         | East-NA (n = 49) |         | West-NA (n = 50) |         | SA (n = 62) |         | raw p-value               | FDR corrected |
|                                                                                                                                                    | rho                                                | p-value | rho              | p-value | rho              | p-value | rho         | p-value |                           |               |
| 1__Bacteroidetes_2__Bacteroidia_3__Bacteroidales_4__Rikenellaceae_5__Rikenellaceae_RC9_gut_group_6__uncultured_organism_faith_pd (alpha-diversity) | 0.2008                                             | 0.0114  | 0.2081           | 0.1514  | 0.2948           | 0.0442  | 0.1636      | 0.2038  | 0.0401                    | 0.6009        |
| 1__Bacteroidetes_2__Bacteroidia_3__Bacteroidales_4__Rikenellaceae_5__Rikenellaceae_RC9_gut_group_6__uncultured_bacterium                           | 0.2159                                             | 0.0065  | 0.2724           | 0.0585  | 0.1015           | 0.4959  | 0.0955      | 0.4595  | 0.1952                    | 0.7090        |
| 1__Firmicutes_2__Clostridia_3__Clostridiales_4__Ruminococcaceae_5__Ruminococcaceae_UCG.014                                                         | 0.0986                                             | 0.2179  | 0.0625           | 0.6695  | 0.2664           | 0.0703  | 0.0661      | 0.6097  | 0.3116                    | 0.7090        |
| 1__Firmicutes_2__Clostridia_3__Clostridiales_4__Lachnospiraceae_5__Lachnospiraceae_NK4A136_group                                                   | -0.1386                                            | 0.0824  | -0.1206          | 0.4090  | -0.2526          | 0.0868  | -0.0177     | 0.8914  | 0.3295                    | 0.7090        |
| 1__Bacteroidetes_2__Bacteroidia_3__Bacteroidales_4__Tannerellaceae_5__Parabacteroides_6__uncultured_bacterium                                      | 0.0789                                             | 0.3244  | 0.0815           | 0.5778  | 0.2094           | 0.1577  | 0.1050      | 0.4166  | 0.3652                    | 0.7090        |
| 1__Firmicutes_2__Clostridia_3__Clostridiales_4__Lachnospiraceae_5__Tyzzerella_6__uncultured_bacterium                                              | -0.1714                                            | 0.0313  | -0.1416          | 0.3306  | -0.1074          | 0.4711  | -0.1138     | 0.3786  | 0.4621                    | 0.7090        |
| 1__Firmicutes_2__Clostridia_3__Clostridiales_4__Lachnospiraceae_5__Oscillibacter                                                                   | 0.0447                                             | 0.5773  | 0.2186           | 0.1312  | 0.0591           | 0.6933  | 0.0582      | 0.6530  | 0.4639                    | 0.7090        |
| 1__Firmicutes_2__Clostridia_3__Clostridiales_4__Ruminococcaceae_5__Ruminiclostridium_6__uncultured_bacterium                                       | 0.1026                                             | 0.1995  | 0.0305           | 0.8350  | 0.0778           | 0.6030  | 0.1898      | 0.1396  | 0.5046                    | 0.7090        |
| 1__Firmicutes_2__Clostridia_3__Clostridiales_4__Ruminococcaceae_5__Ruminiclostridium_6__uncultured_bacterium                                       | 0.0583                                             | 0.4667  | 0.0947           | 0.5175  | 0.1060           | 0.4784  | 0.1339      | 0.2994  | 0.5179                    | 0.7090        |
| 1__Bacteroidetes_2__Bacteroidia_3__Bacteroidales_4__Marinifilaceae_5__Odoribacter_6__uncultured_bacterium                                          | 0.0991                                             | 0.2152  | 0.2110           | 0.1455  | 0.0165           | 0.9121  | 0.0749      | 0.5630  | 0.5200                    | 0.7090        |
| 1__Firmicutes_2__Clostridia_3__Clostridiales_4__Lachnospiraceae_5__Lachnoclostridium                                                               | 0.0597                                             | 0.4562  | 0.0825           | 0.5730  | 0.0757           | 0.6132  | 0.0572      | 0.6588  | 0.8180                    | 0.9521        |
| 1__Firmicutes_2__Clostridia_3__Clostridiales_4__Lachnospiraceae_5__GCA.900066575_6__uncultured_bacterium                                           | 0.0097                                             | 0.9041  | 0.0771           | 0.5986  | 0.0955           | 0.5233  | 0.0394      | 0.7609  | 0.8252                    | 0.9521        |
| 1__Firmicutes_2__Clostridia_3__Clostridiales_4__Lachnospiraceae_5__uncultured_bacterium                                                            | -0.0680                                            | 0.3957  | -0.0139          | 0.9243  | -0.0976          | 0.5142  | -0.0050     | 0.9693  | 0.9561                    | 0.9692        |
| 1__Firmicutes_2__Clostridia_3__Clostridiales_4__Ruminococcaceae_5__Ruminiclostridium_9                                                             | -0.0421                                            | 0.5993  | -0.0592          | 0.6862  | -0.0459          | 0.7593  | -0.0031     | 0.9806  | 0.9692                    | 0.9692        |

<sup>1</sup> 15 out of 58 microbial measurements are listed that showed consistent slopes across all three latitudinal transects.



# MOLECULAR ECOLOGY

**Table S13.** Repeated associations between microbial measurements and residual BMI accounted for the effects of latitude.

| Microbial measurements <sup>1</sup>                                                                                                            | Spearman rho correlation with residual BMI |          |                  |         |                  |         |             |         | Fisher's combined p-value |               |
|------------------------------------------------------------------------------------------------------------------------------------------------|--------------------------------------------|----------|------------------|---------|------------------|---------|-------------|---------|---------------------------|---------------|
|                                                                                                                                                | All (n = 161)                              |          | East-NA (n = 49) |         | West-NA (n = 50) |         | SA (n = 62) |         | raw p-value               | FDR corrected |
|                                                                                                                                                | rho                                        | p-value  | rho              | p-value | rho              | p-value | rho         | p-value |                           |               |
| <b>1__Firmicutes_2__Clostridia_3__Clostridiales_4__Ruminococcaceae_5__Ruminiclostridium_6__uncultured_bacterium</b>                            | 0.4284                                     | 1.97E-08 | 0.0565           | 0.6996  | 0.4277           | 0.0027  | 0.3643      | 0.0036  | 0.0006                    | 0.0154        |
| <b>1__Bacteroidetes_2__Bacteroidia_3__Bacteroidales_4__Rikenellaceae_5__Rikenella_6__uncultured_bacterium</b>                                  | 0.3226                                     | 3.57E-05 | 0.1200           | 0.4113  | 0.3036           | 0.0380  | 0.3756      | 0.0026  | 0.0026                    | 0.0345        |
| <b>1__Bacteroidetes_2__Bacteroidia_3__Bacteroidales_4__Rikenellaceae_5__Rikenellaceae_RC9_gut_group_6__uncultured_organism</b>                 | 0.1584                                     | 0.0469   | 0.2748           | 0.0560  | 0.2521           | 0.0873  | 0.2900      | 0.0222  | 0.0056                    | 0.0409        |
| <b>1__Firmicutes_2__Clostridia_3__Clostridiales_4__Ruminococcaceae_5__Oscillibacter_6__unidentified</b>                                        | 0.2632                                     | 0.0008   | 0.2954           | 0.0393  | 0.0788           | 0.5985  | 0.3516      | 0.0051  | 0.0061                    | 0.0409        |
| <b>shannon (alpha-diversity)</b>                                                                                                               | 0.4434                                     | 7.84E-09 | 0.0191           | 0.8963  | 0.4123           | 0.0043  | 0.2586      | 0.0427  | 0.0078                    | 0.0419        |
| <b>1__Firmicutes_2__Clostridia_3__Clostridiales_4__Lachnospiraceae_5__Lachnospiraceae_NK4A136_group</b>                                        | 0.4183                                     | 4.52E-08 | 0.2959           | 0.0390  | 0.1114           | 0.4561  | 0.3118      | 0.0136  | 0.0107                    | 0.0480        |
| observed_otus (alpha-diversity)                                                                                                                | -0.0131                                    | 0.8706   | 0.0459           | 0.7540  | 0.3334           | 0.0220  | 0.2674      | 0.0356  | 0.0213                    | 0.0822        |
| 1__Proteobacteria_2__Deltaproteobacteria_3__Desulfovibrionales_4__Desulfovibrionaceae_5__uncultured_6__uncultured_Desulfovibrionales_bacterium | 0.2530                                     | 0.0013   | 0.0928           | 0.5261  | 0.4477           | 0.0016  | 0.0222      | 0.8642  | 0.0250                    | 0.0844        |
| 1__Tenericutes                                                                                                                                 | 0.2468                                     | 0.0018   | 0.2633           | 0.0676  | 0.3017           | 0.0393  | 0.1230      | 0.3408  | 0.0295                    | 0.0850        |
| 1__Proteobacteria_2__Deltaproteobacteria_3__Desulfovibrionales_4__Desulfovibrionaceae_5__uncultured_6__uncultured_bacterium                    | 0.1063                                     | 0.1839   | 0.3679           | 0.0093  | 0.0189           | 0.8996  | 0.2006      | 0.1180  | 0.0315                    | 0.0850        |
| faith_pd (alpha-diversity)                                                                                                                     | -0.0968                                    | 0.2259   | 0.1126           | 0.4401  | 0.3921           | 0.0068  | 0.0389      | 0.7635  | 0.0581                    | 0.1255        |
| 1__Firmicutes_2__Clostridia_3__Clostridiales_4__Ruminococcaceae_5__Ruminiclostridium_9                                                         | 0.2408                                     | 0.0023   | 0.1732           | 0.2340  | 0.2463           | 0.0951  | 0.2081      | 0.1045  | 0.0592                    | 0.1255        |
| 1__Firmicutes_2__Clostridia_3__Clostridiales_4__Lachnospiraceae_5__Lachnospiraceae_NK4A136_group_6__uncultured_bacterium                       | 0.4040                                     | 1.41E-07 | 0.0804           | 0.5831  | 0.1981           | 0.1820  | 0.2864      | 0.0240  | 0.0633                    | 0.1255        |
| 1__Firmicutes_2__Clostridia_3__Clostridiales_4__Lachnospiraceae_5__uncultured                                                                  | 0.3359                                     | 1.6E-05  | 0.0476           | 0.7453  | 0.1155           | 0.4394  | 0.3334      | 0.0081  | 0.0651                    | 0.1255        |
| 1__Bacteroidetes_2__Bacteroidia_3__Bacteroidales_4__Marinifilaceae_5__Odoribacter_6__uncultured_bacterium                                      | 0.1676                                     | 0.0353   | 0.1499           | 0.3040  | 0.0074           | 0.9606  | 0.3197      | 0.0113  | 0.0761                    | 0.1369        |
| 1__Deferribacteres_2__Deferribacteres_3__Deferribacterales_4__Deferribacteraceae_5__Mucispirillum_6__uncultured_bacterium                      | -0.0325                                    | 0.6849   | 0.0749           | 0.6092  | 0.2015           | 0.1745  | 0.2453      | 0.0546  | 0.1127                    | 0.1902        |
| 1__Bacteroidetes_2__Bacteroidia_3__Bacteroidales_4__Rikenellaceae_5__Alistipes_6__uncultured_bacterium                                         | 0.0595                                     | 0.4576   | 0.2377           | 0.1001  | 0.0592           | 0.6928  | 0.2028      | 0.1139  | 0.1387                    | 0.2083        |
| 1__Firmicutes_2__Clostridia_3__Clostridiales_4__Ruminococcaceae_5__Ruminiclostridium_9_6__uncultured_bacterium                                 | 0.0123                                     | 0.8778   | 0.0581           | 0.6917  | 0.2185           | 0.1400  | 0.2163      | 0.0913  | 0.1494                    | 0.2083        |
| 1__Firmicutes_2__Clostridia_3__Clostridiales_4__Ruminococcaceae_5__uncultured                                                                  | 0.1440                                     | 0.0711   | 0.1235           | 0.3978  | 0.1821           | 0.2207  | 0.2099      | 0.1016  | 0.1503                    | 0.2083        |
| 1__Epsilonbacteraeota                                                                                                                          | 0.1632                                     | 0.0405   | 0.0148           | 0.9196  | 0.0643           | 0.6668  | 0.3073      | 0.0151  | 0.1543                    | 0.2083        |
| 1__Epsilonbacteraeota_2__Campylobacteria_3__Campylobacterales_4__Helicobacteraceae_5__Helicobacter                                             | 0.1591                                     | 0.0459   | 0.0090           | 0.9512  | 0.0525           | 0.7253  | 0.3073      | 0.0151  | 0.1667                    | 0.2143        |
| 1__Firmicutes_2__Clostridia_3__Clostridiales_4__Lachnospiraceae_5__Lachnoclostridium_6__Dorea_sp_5.2                                           | 0.2540                                     | 0.0013   | 0.2015           | 0.1650  | 0.0573           | 0.7021  | 0.1732      | 0.1783  | 0.2562                    | 0.3145        |
| 1__Bacteroidetes_2__Bacteroidia_3__Bacteroidales_4__Muribaculaceae_5__uncultured_Bacteroidales_bacterium_6__uncultured_Bacteroidales_bacterium | -0.1226                                    | 0.1249   | -0.2338          | 0.1059  | -0.0235          | 0.8752  | -0.1411     | 0.2739  | 0.2900                    | 0.3404        |
| 1__Firmicutes_2__Clostridia_3__Clostridiales_4__Ruminococcaceae_5__uncultured_6__unidentified                                                  | 0.0400                                     | 0.6180   | 0.1053           | 0.4716  | 0.0073           | 0.9610  | 0.2232      | 0.0812  | 0.3590                    | 0.4039        |
| 1__Firmicutes_2__Clostridia_3__Clostridiales_4__Peptococcaceae_5__uncultured_6__uncultured_bacterium                                           | 0.4007                                     | 1.82E-07 | 0.1441           | 0.3231  | 0.0111           | 0.9409  | 0.1933      | 0.1323  | 0.3771                    | 0.4073        |
| 1__Bacteroidetes_2__Bacteroidia_3__Bacteroidales_4__Bacteroidaceae_5__Bacteroides                                                              | 0.0714                                     | 0.3730   | -0.2188          | 0.1310  | -0.0630          | 0.6730  | -0.0616     | 0.6346  | 0.4498                    | 0.4671        |
| 1__Firmicutes_2__Clostridia_3__Clostridiales_4__Lachnospiraceae_5__uncultured_6__Clostridium_sp_Culture41                                      | 0.2515                                     | 0.0014   | 0.1897           | 0.1918  | 0.0034           | 0.9818  | 0.0307      | 0.8128  | 0.7100                    | 0.7100        |

<sup>1</sup> 27 out of 58 microbial measurements are listed that showed consistent slopes across all three latitudinal transects. Microbial measurements in bold indicate significant correlation with residual values between BMI and latitude based on FDR corrected Fisher's combined p-value.

# MOLECULAR ECOLOGY

**Table S14.** Significant associations between microbial measurements and body weight in lab reared individuals.

| Microbial measurements <sup>1</sup>                                                                                                       | Spearman rho correlation with body weight (g) |          |                       |
|-------------------------------------------------------------------------------------------------------------------------------------------|-----------------------------------------------|----------|-----------------------|
|                                                                                                                                           | Lab (n = 116)                                 |          |                       |
|                                                                                                                                           | rho                                           | p-value  | FDR corrected p-value |
| <b>1__Bacteroidetes_2__Bacteroidia_3__Bacteroidales_4__Muribaculaceae_5__Muribaculum_6__uncultured_bacterium</b>                          | 0.618                                         | 1.47E-13 | 5.428E-12             |
| <b>1__Bacteroidetes_2__Bacteroidia_3__Bacteroidales_4__Prevotellaceae_5__Prevotellaceae_UCG.001</b>                                       | 0.616                                         | 1.84E-13 | 5.428E-12             |
| <b>1__Bacteroidetes_2__Bacteroidia_3__Bacteroidales_4__Rikenellaceae_5__Rikenellaceae_RC9_gut_group_6__uncultured_bacterium</b>           | 0.531                                         | 8.70E-10 | 1.711E-08             |
| <b>1__Bacteroidetes_2__Bacteroidia_3__Bacteroidales_4__Muribaculaceae</b>                                                                 | 0.509                                         | 5.35E-09 | 7.89125E-08           |
| shannon (alpha-diversity)                                                                                                                 | 0.502                                         | 9.75E-09 | 9.93167E-08           |
| obs_OTU (alpha-diversity)                                                                                                                 | 0.501                                         | 1.01E-08 | 9.93167E-08           |
| faith_pd (alpha-diversity)                                                                                                                | 0.392                                         | 1.33E-05 | 0.0001                |
| <b>1__Cyanobacteria</b>                                                                                                                   | 0.389                                         | 1.57E-05 | 0.0001                |
| <b>1__Cyanobacteria_2__Melainabacteria_3__Gastranaerophilales_4__uncultured_bacterium_5__uncultured_bacterium_6__uncultured_bacterium</b> | 0.340                                         | 0.0002   | 0.0012                |
| <b>1__Firmicutes_2__Clostridia_3__Clostridiales_4__Lachnospiraceae_5__Marvinbryantia_6__uncultured_bacterium</b>                          | 0.275                                         | 0.0028   | 0.0168                |
| <b>1__Firmicutes_2__Bacilli_3__Lactobacillales_4__Lactobacillaceae_5__Lactobacillus</b>                                                   | 0.263                                         | 0.0043   | 0.0231                |
| <b>1__Epsilonbacteraeota_2__Campylobacteria_3__Campylobacterales_4__Helicobacteraceae_5__Helicobacter</b>                                 | 0.258                                         | 0.0051   | 0.0252                |
| <b>1__Firmicutes_2__Clostridia_3__Clostridiales_4__Lachnospiraceae_5__Lachnospiraceae_UCG.001_6__uncultured_bacterium</b>                 | 0.251                                         | 0.0066   | 0.0297                |
| <b>1__Firmicutes_2__Clostridia_3__Clostridiales_4__Ruminococcaceae_5__Ruminiclostridium_6__uncultured_bacterium</b>                       | 0.240                                         | 0.0094   | 0.0382                |
| <b>1__Bacteroidetes_2__Bacteroidia_3__Bacteroidales_4__Rikenellaceae_5__Alistipes_6__uncultured_bacterium</b>                             | -0.239                                        | 0.0097   | 0.0382                |
| <b>1__Firmicutes_2__Clostridia_3__Clostridiales_4__Clostridiales_vadinBB60_group</b>                                                      | 0.232                                         | 0.0123   | 0.0455                |

<sup>1</sup> 16 out of 59 microbial measurements are listed that showed significant correlation with body weight in lab reared individuals. Microbial measurements in bold indicate significant Spearman rho p-values corrected for FDR.

# MOLECULAR ECOLOGY

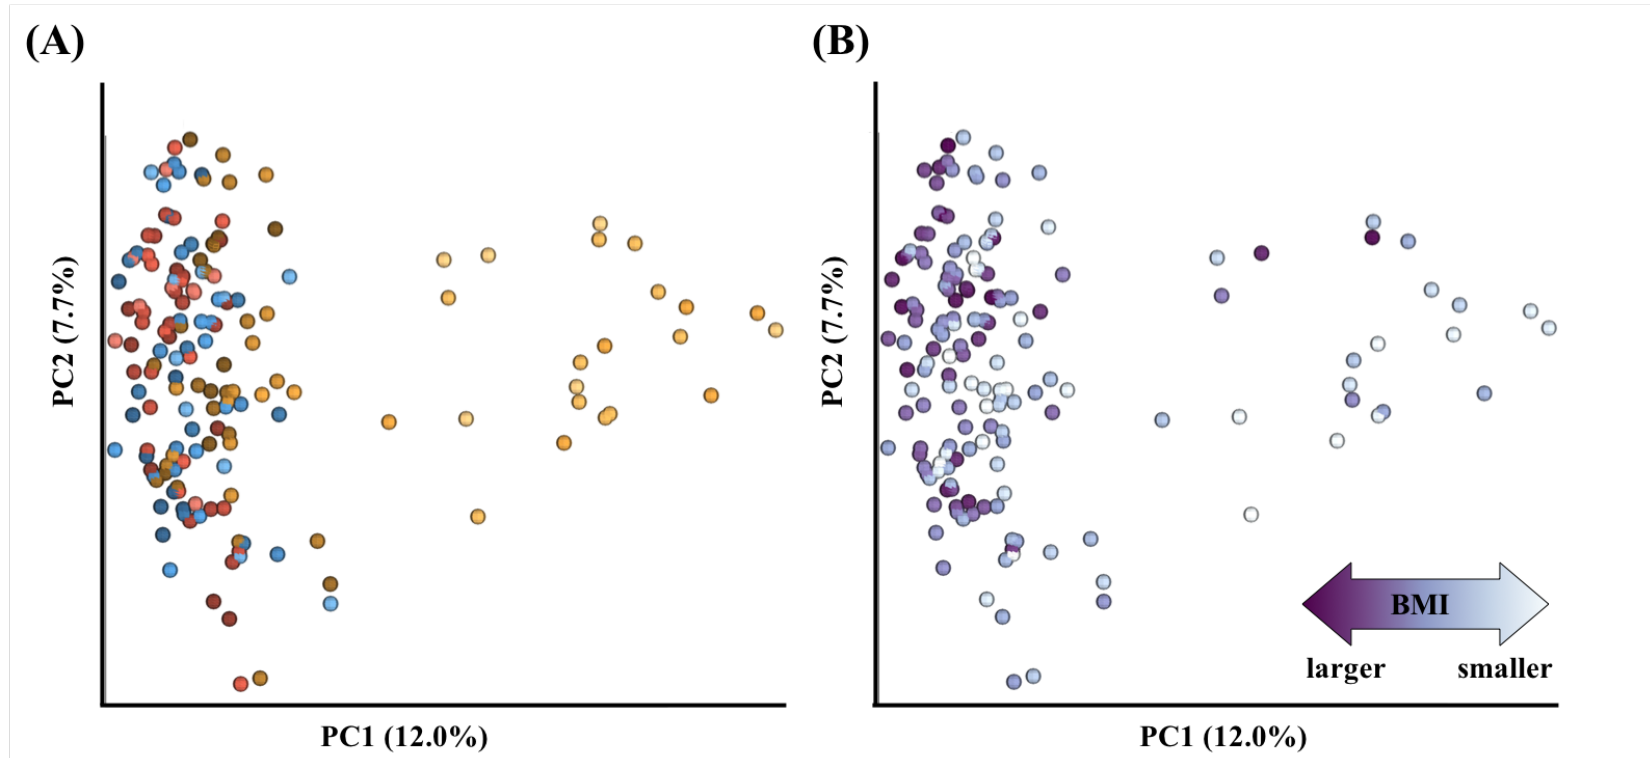

**Figure S1.** PCoA plot of Bray-Curtis dissimilarity clustered by 94% sequence identity. (A) Associations between Bray-Curtis dissimilarity and geography. Colors in correspond to populations in Fig. 1A. (B) Association between Bray-Curtis dissimilarity and BMI. Color darkness reflects greater BMI.

# MOLECULAR ECOLOGY

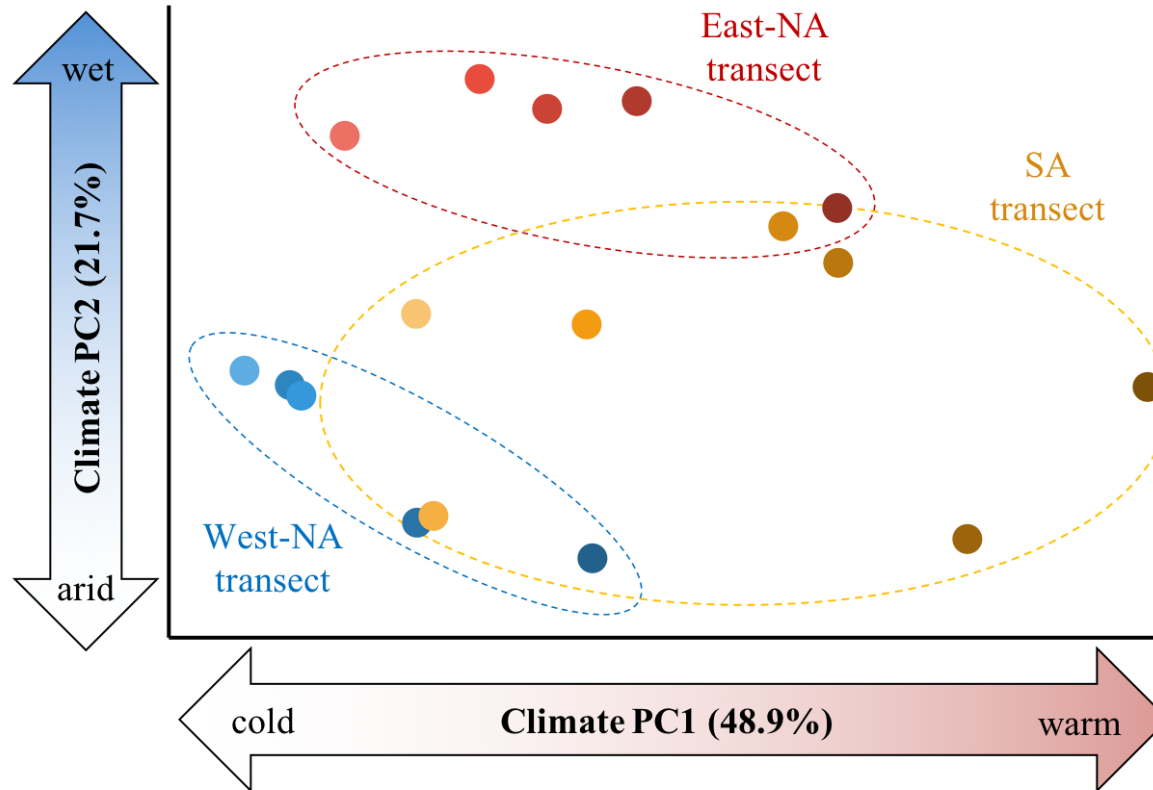

**Figure S2.** Climate PCA plot. Data points are average climate PCs per population. Colors correspond to Fig.1A. Climate PC1 is mostly explained by temperature-related variables. Climate PC2 is mostly explained by precipitation-related variables. See Table S2 for PC loadings.

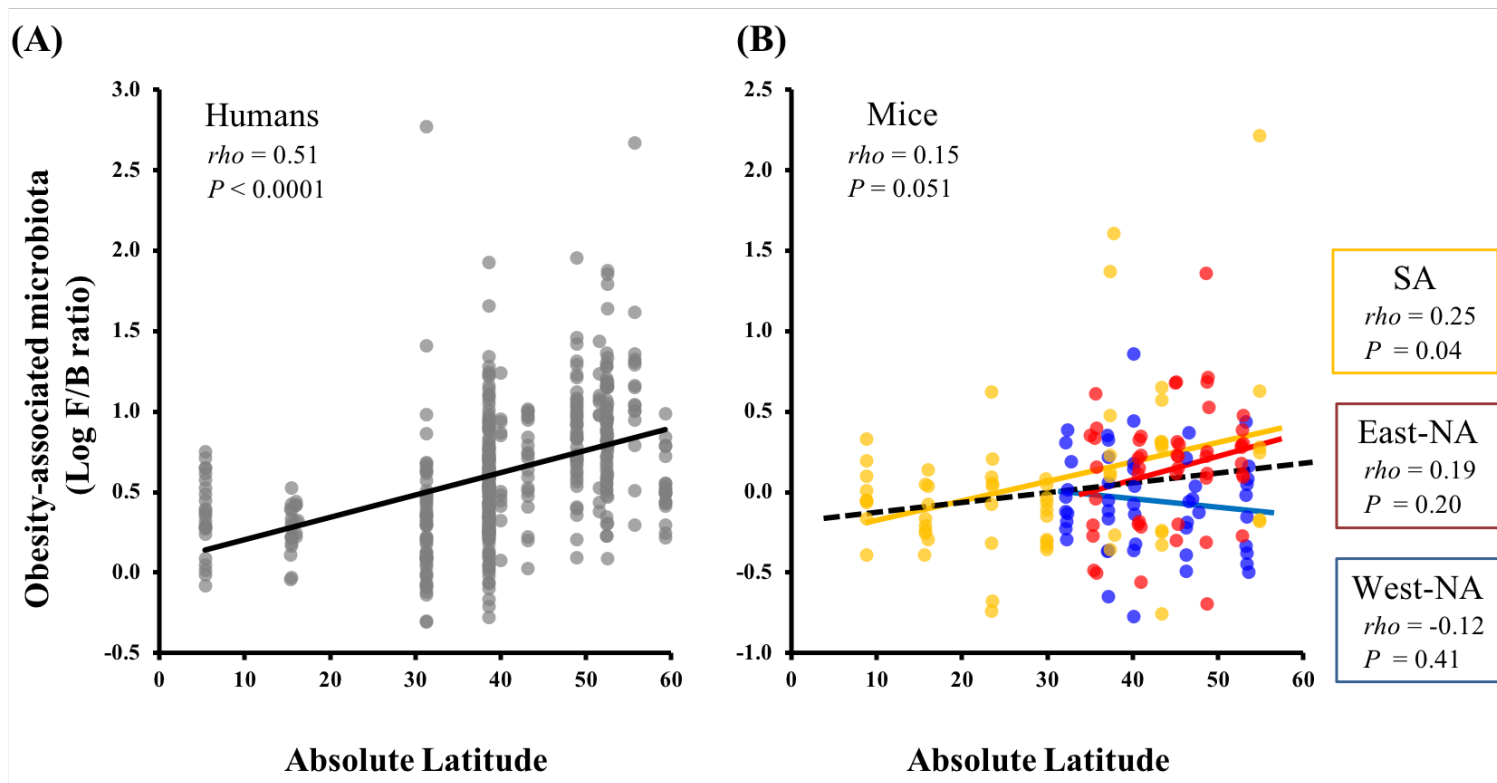

**Figure S3.** Correlations between log ratio of relative abundance of Firmicutes and Bacteroidetes (F/B ratio) and absolute latitude in humans and house mice. Greater F/B ratio is associated with obesity in humans and mice (Ley et al. 2006, Turnbaugh et al. 2006). (A) In healthy adult humans, a significant positive correlation between log(F/B ratio) and absolute latitude was observed ( $\rho = 0.51$ ,  $p < 0.0001$ ) (Suzuki and Worobey 2012). (B) In wild house mice, non-significant but positive slopes were observed between log(F/B ratio) and absolute latitude using all samples. Only SA-transect showed a significant positive correlation between latitude and log(F/B ratio) ( $\rho = 0.25$ ,  $p = 0.04$ ).

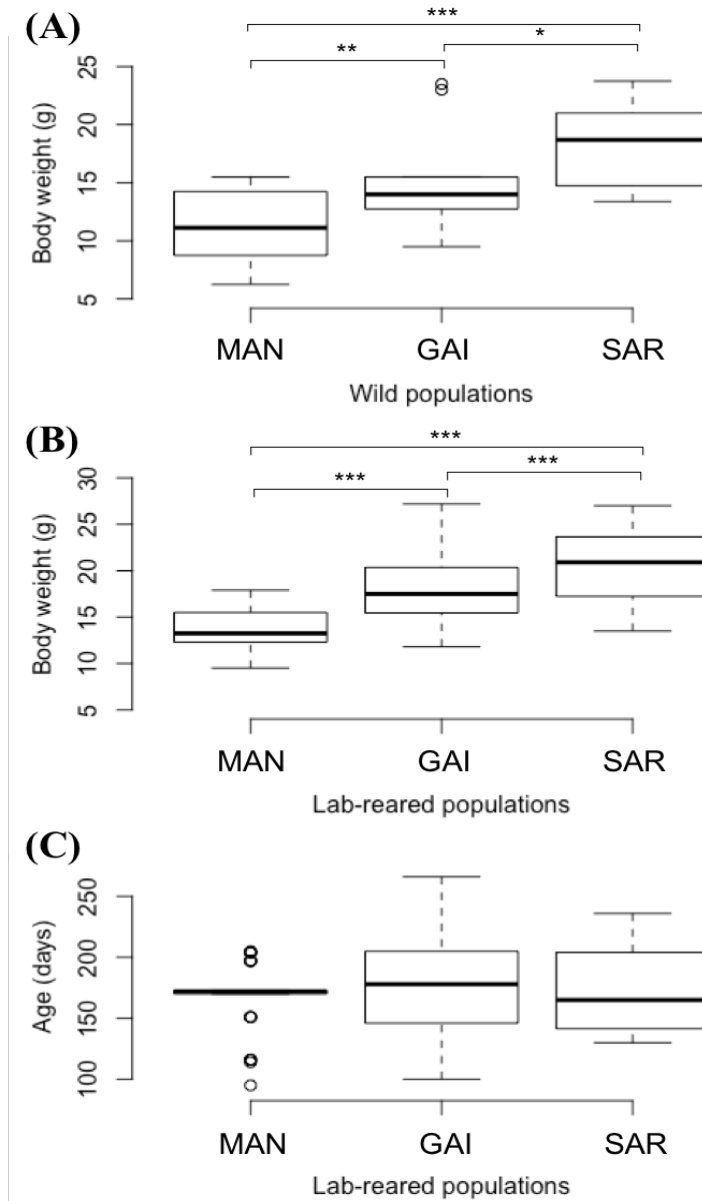

**Figure S4.** Population difference in body weight persists in a common environment. (A) Body weight differ among the wild populations (ANOVA  $p = 0.0015$ ). (B) Body weight differ among lab-reared populations (ANOVA  $p < 0.0001$ ). (C) Age does not differ among lab-reared populations (ANOVA  $p = 0.33$ ). Pairwise significance is based on Student's t-test: \*  $p < 0.1$ , \*\*  $p < 0.05$ , \*\*\*  $p < 0.001$ .
